1 ***Polo-like kinase 2 inhibition reduces serine-129 phosphorylation of physiological nuclear***  
2 ***alpha-synuclein but not of the aggregated alpha-synuclein***

3

4 **Authors:**

5 Sara Elfarrash<sup>1,2,3,4¶\*</sup>, Nanna Møller Jensen<sup>1,2¶</sup>, Nelson Ferreira<sup>1,2</sup>, Sissel Ida Schmidt<sup>5</sup>, Emil Gregersen<sup>1,2</sup>  
6 ,Marie Vibeke Vestergaard<sup>1,2</sup>, Sadegh Nabavi<sup>1,6</sup>, Morten Meyer<sup>5,7,8</sup>, Poul Henning Jensen<sup>1,2\*</sup>

7 **Affiliations:**

8 1. Danish Research Institute of Translational Neuroscience – DANDRITE, Aarhus University, Aarhus,  
9 Denmark.

10 2. Department of Biomedicine, Aarhus University, Aarhus, Denmark.

11 3. Department of Medical Physiology, Faculty of Medicine, Mansoura University, Mansoura, Egypt.

12 4. MERC- Mansoura Experimental Research Center, Faculty of Medicine, Mansoura University, Mansoura,  
13 Egypt.

14 5. Department of Neurobiology Research, Institute of Molecular Medicine, University of Southern  
15 Denmark, Odense, Denmark.

16 6. Department of Molecular Biology and Genetics, Aarhus University, Aarhus, Denmark

17 7. Department of Neurology, Odense University Hospital, Odense, Denmark

18 8. BRIDGE - Brain Research Inter-Disciplinary Guided Excellence, Department of Clinical Research,  
19 University of Southern Denmark, Odense, Denmark.

20

21 **\* Corresponding author:**

22 Email: [saraelfarrash@mans.edu.eg](mailto:saraelfarrash@mans.edu.eg) (SE)

23 Email: [phj@biomed.au.dk](mailto:phj@biomed.au.dk) (PHJ)

24 ¶ These authors contributed equally to this work.

25

## 26 **Abstract**

27 Accumulation of aggregated alpha-synuclein ( $\alpha$ -syn) is believed to play a pivotal role in the  
28 pathophysiology of Parkinson's disease (PD) and other synucleinopathies.  $\alpha$ -Syn is a key  
29 constituent protein of Lewy pathology, and  $\alpha$ -syn phosphorylated at serine-129 (pS129)  
30 constitutes more than 90% of  $\alpha$ -syn in Lewy bodies and hence, it is used extensively as a  
31 pathological marker for the aggregated form of  $\alpha$ -syn. However, the exact role of pS129 remains  
32 controversial as well as the kinase(s) responsible for the phosphorylation.

33 In this study, we investigated the effect of Polo-like kinase 2 (PLK2) inhibition on formation of  
34 pS129 using ex-vivo organotypic brain slice model of synucleinopathy. Our data demonstrated  
35 that PLK2 inhibition has no effect on  $\alpha$ -syn aggregation, pS129 or inter-neuronal spreading of the  
36 aggregated  $\alpha$ -syn seen in the organotypic slices. Instead, PLK2 inhibition reduced the soluble  
37 nuclear pS129 level confined in the nuclei. The same finding was replicated in an in-vivo mouse  
38 models of templated  $\alpha$ -syn aggregation and human dopaminergic neurons, suggesting that PLK2  
39 is more likely to be involved in S129 phosphorylation of soluble non-pathology related fraction of  
40  $\alpha$ -syn. We also demonstrated that reduction of nuclear pS129 but not the aggregates specific pS129  
41 following PLK2 inhibition for a short time before sample collection improves the signal to noise  
42 ratio when quantifying pS129 aggregate pathology.

43

## 44 **Introduction**

45 Mounting evidence from biochemical, pathological and genetic studies strongly suggest a role of  
46 alpha-synuclein ( $\alpha$ -syn) in the pathogenesis of a group of neurodegenerative diseases, collectively  
47 called synucleinopathies [1]. These diseases, which include Parkinson's disease (PD), dementia  
48 with Lewy bodies (DLB) and multiple system atrophy (MSA), share a common pathological  
49 hallmark, namely the development of inclusions containing  $\alpha$ -syn aggregates in affected brain  
50 cells. The aggregated  $\alpha$ -syn is a main constituent of Lewy pathology detected in neuronal axons  
51 and soma in PD and DLB, and in oligodendrocytes as glial cytoplasmic inclusions in MSA [1].  $\alpha$ -  
52 Syn is subject to multiple types of posttranslational modifications [2], and phosphorylation at  
53 serine-129 (pS129) has attracted special attention as approximately 90% of aggregated  $\alpha$ -syn in

54 the brains of PD patients is stably phosphorylated at this site [3], [4], [5]. In contrast, physiological  
55  $\alpha$ -syn is transiently phosphorylated on S129 with less than 4% phosphorylated [3], [4].

56 Despite the advantages of pS129 as a biomarker for pathological  $\alpha$ -syn aggregates, its  
57 pathophysiological role has been contested [6], [7], [8], [9], [10]. Some studies demonstrate an  
58 increased toxicity associated to S129-phosphorylation [8], [9], [11], whereas others suggests it has  
59 no role in  $\alpha$ -syn aggregation or toxicity [12], [13] or even being a protective modification [6], [7].

60 To date, in vitro and in vivo studies have determined a number of kinases able to phosphorylate  $\alpha$ -  
61 syn at S129, including the Polo-like kinases (PLK) 2 and 3, casein kinases 1 and 2, Leucine-rich  
62 repeat kinase 2 (LRRK2) and various G-protein coupled receptor kinases (GRKs) [14], [11], [15],  
63 [16], [17], [18]. Of these, PLK2 has been extensively studied [19], [20], [21], [10], [22] but mostly  
64 in relation to phosphorylation of physiological, non-aggregated  $\alpha$ -syn or the regulation of  $\alpha$ -syn  
65 expression [19], [21], [22], [23].

66 In this study, we used a validated PLK2-inhibitor, compound 37 [24], [21], [23], and the PLK1-3  
67 inhibitor BI2536 [25], to investigate the role of PLK2 in the S129-phosphorylation of  $\alpha$ -syn  
68 aggregates in PD models induced by pre-formed  $\alpha$ -syn fibrils (PFFs).

69 We employed multiple model systems of  $\alpha$ -syn aggregation, including mouse organotypic brain  
70 slices,  $\alpha$ -syn-transgenic mice, and human dopaminergic cell cultures to assess the potential of  
71 inhibiting PLK2 on development of pS129-positive aggregates or dephosphorylation of such  
72 already formed. We demonstrate that inhibition of PLK2 could neither revert nor prevent S129-  
73 phosphorylation of  $\alpha$ -syn aggregate inclusions or prevent the spreading of  $\alpha$ -syn aggregate  
74 pathology between neurons. In contrast, PLK2 was responsible for a significant part of the basal  
75  $\alpha$ -syn S129-phosphorylation predominantly located in neuronal nuclei.

76

## 77 **Materials and Methods**

### 78 **1. Preparation of organotypic hippocampal slice cultures (OHSCs)**

79 Organotypic hippocampal slices were prepared from 5-7-day-old C57Bl6 pups according to  
80 Stoppini et al. 1991 [26] with slight modifications as described in [13]. Briefly, the hippocampi  
81 were extracted in carbonated low Na cerebrospinal fluid (CSF) (1 mM CaCl<sub>2</sub>, 10 mM D-glucose,

82 4 mM KCl, 5 mM MgCl<sub>2</sub>, 26 mM NaHCO<sub>3</sub>, 234 mM sucrose and 0.1% phenol red solution) and  
83 coronal slices of 400 μm were made using a tissue chopper (Stoelting, #51425). Hippocampal  
84 slices with intact dentate gyrus (DG) and cornu ammonis (CA) regions were selected and  
85 maintained on air-fluid interface-style Millicell culture inserts, 30 mm diameter, 0.4 μm  
86 (Millipore) in 6-well culture plates (ThermoFisher Scientific) with 800 μL of 37°C pre-heated  
87 sterile medium (MEM Eagle medium 78.8% (Gibco #11095), 20% heat-inactivated horse serum  
88 (Gibco, #16050-122), 1 mM L-glutamine, 1 mM CaCl<sub>2</sub>, 2 mM MgSO<sub>4</sub>, 170 nM insulin, 0.0012%  
89 ascorbic acid, 12.9 mM D-glucose, 5.2 mM NaHCO<sub>3</sub>, 300 mM Hepes (Sigma #H3375), pH=7.28,  
90 osmolality adjusted to 317-322). The medium was replaced completely three times per week.

91

## 92 **2. Microinjection of OHSCs with S129A PFFs**

93 PFFs were produced from monomeric human recombinant α-syn with residue serine-129 shifted  
94 to alanine (S129A). S129A PFF production, characterization and validation of efficient  
95 aggregation was done as described in [13]. The usage of S129A PFFs that are non-  
96 phosphorylatable at S129 ensures that only the endogenously expressed α-syn is detected when  
97 antibodies against pS129 are used during analysis.

98 Immediately before injection, an aliquot of S129A PFFs was thawed at room temperature (RT)  
99 and sonicated for 30 seconds using Branson Sonifier 250 with settings adjusted to 30% duty cycle,  
100 output control 3. The sonicator is customized and equipped with a water jacket cooling system to  
101 avoid sample heating during sonication. OHSCs were microinjected with S129A PFFs or sterile  
102 phosphate buffered saline (PBS) at DG after 7 days in culture. Microinjection pipettes (item  
103 #1B200F-4 (with Filament), WPI) were pulled using a micropipette puller (P-1000, Sutter  
104 Instrument). For injection, a Pulse Pal v2 (#1102) was set to phase 1 voltage 5V, phase 1 duration  
105 0.01 seconds, pulse interval 0.5 seconds. The pipette was loaded using Eppendorf microloader  
106 pipette tips (ThermoFisher). A final volume of 0.1 μL of either S129A PFFs (1 mg/mL) or PBS  
107 was injected at DG under microscopic guidance as described in [13].

108 Injections were performed under strict aseptic condition in a laminar flow hood equipped with a  
109 microscope. After injecting all slices on a culture insert, the medium was replaced with fresh pre-  
110 heated medium.

111

## 112 **3. Polo-like kinase 2 (PLK2) inhibition in OHSCs**

113 After 6 days in culture, 24 hours before S129A PFF microinjection, organotypic hippocampal  
114 slices were treated with either 20  $\mu$ M PLK2i (compound 37 custom synthesized by Wuxi AppTec,  
115 Shanghai, China) [21], [23], or 0.2% DMSO (Sigma, #RNBF6889) as a solvent control. The drug  
116 activity and specificity of PLK2i were validated earlier in our lab as described earlier in [23].  
117 Medium containing the drug/vehicle was added below the membrane insert along with a drop of 1  
118  $\mu$ L on the slice surface to facilitate an equal distribution of the drug throughout the organotypic  
119 brain slice thickness [27]. The drug/vehicle mixture was added throughout the experiment with  
120 each change of the medium, three times per week.

121 To evaluate the effect of short-term PLK2 inhibition on PFF-seeded OHSCs, organotypic slices  
122 were treated as described above with either 20  $\mu$ M PLK2i (compound 37) or 1  $\mu$ M of the PLK1-3  
123 inhibitor BI2536 (Selleck, #S1109) [17] for 24 hours before fixation.

124

#### 125 **4. Immunoblotting and sequential biochemical fractionation of OHSCs**

126

127 7 days following PFF injection, slices were cut from the culture membrane, maintaining a small  
128 border of membrane around the slice to ensure that all the tissue was collected. For each group,  
129 ten slices were analyzed. Protein quantification, sequential fractionation into RIPA-soluble and -  
130 insoluble fractions and subsequent immunoblotting was carried out as described in [13].  
131 Antibodies used were: rabbit polyclonal anti- $\alpha$ -syn (ASY-1, 1:1000) [28], mouse monoclonal  
132 pS129- $\alpha$ -syn (11A5, kindly provided by Imago Pharmaceuticals, 1:2000) [4], rabbit monoclonal  
133 rodent-specific  $\alpha$ -syn (D37A6, #4179, Cell Signaling, 1:1000) and mouse monoclonal anti- $\beta$ -  
134 tubulin III (TUJ1, #T8578, Sigma, 1:5000). PageRuler pre-stained protein ladder 10-180 kDa  
135 (ThermoFisher, #26616) was used as the molecular size marker.

136

#### 137 **5. Immunofluorescence staining of OHSCs**

138

139 7 days following S129A PFF-injection, OHSCs were fixed using 4% PFA in PBS (2.8 mM  
140  $\text{NaH}_2\text{PO}_4 \cdot \text{H}_2\text{O}$ , 7.2 mM  $\text{Na}_2\text{HPO}_4 \cdot 2\text{H}_2\text{O}$ , 123 mM NaCl, pH adjusted to 7.2) and processed for  
141 immunohistochemistry as described in [13]. Antibodies used were  $\alpha$ -syn aggregate-specific  
142 antibody MJF-14 (rabbit monoclonal MJFR-14-6-4-2, #ab209538, Abcam, 1:25,000) and mouse

143 monoclonal pS129- $\alpha$ -syn (11A5, kindly provided by Imago Pharmaceuticals, 1:25,000) [4]. After  
144 washing off unbound primary antibody, slices were incubated with the appropriate Alexa Fluor-  
145 labelled (488 and 568) secondary antibodies (Invitrogen, 1:2000) and 4',6-diamidino-2-  
146 phenylindole (DAPI) (TH.GEYER, 5  $\mu$ g/mL) in 5% BSA/PBS.

147

## 148 **6. M83 mouse treatment with PLK2i**

149 Animals were housed in a temperature-controlled room, under a 12 h light/dark period, with water  
150 and food ad libitum. Twelve-month-old M83<sup>+/-</sup>  $\alpha$ -syn transgenic mice were anaesthetized by 3.5%  
151 isoflurane inhalation and bilaterally injected with recombinant mouse  $\alpha$ -syn PFFs by inserting the  
152 needle ~1 mm deep into the biceps femoris as described by [29]. Recombinant mouse  $\alpha$ -syn PFFs  
153 were prepared and validated for aggregation properties as described previously for human  $\alpha$ -syn  
154 PFFs in [13] (Supplementary fig. 1). Injections were made using a 10- $\mu$ L Hamilton syringe with a  
155 25-gauge needle.

156 Once mice displayed hind limbs paralysis (typically 10-12 weeks post-injection) mice were treated  
157 for 2 days with PLK2i (Lundbeck, compound 37) by oral gavage (n=5, 2x100 mg/kg/day) or  
158 vehicle control (5% DMSO, 1% methylcellulose, n=5). Then, mice were anaesthetized and  
159 perfused with PBS with 1 $\times$  complete protease inhibitor cocktail (cOmplete, Roche) and  
160 phosphatase inhibitors (25 mM  $\beta$ -glycerolphosphate, 5 mM NaF, 1 mM Na<sub>3</sub>VO<sub>4</sub>, 10 mM Na-  
161 pyrophosphate), followed by 4% PFA/PBS. Brains were removed and kept in 4% PFA/PBS for 48  
162 hours at 4°C, and then stored in 30% sucrose in PBS with 0.05% NaN<sub>3</sub> until cryosectioning.

## 163 **7. Cryosectioning and immunofluorescence staining of M83 mouse brain**

164 For cryosectioning, brains were mounted on the cryostat stage (Leica) using Tissue-Tek® O.C.T.  
165 Compound (Sakura). After the OCT solidified, the brain was sliced at a thickness of 10-12  $\mu$ m at  
166 -20°C. Sections were collected on Superfrost Plus Adhesion Microscope Slides (ThermoFisher)  
167 and subsequently processed for immunostaining. Tissue was permeabilized in 0.5% Triton X-100  
168 followed by blocking with 10% BSA, for 45 minutes each at room temperature (RT) with gentle  
169 shaking. For primary antibody incubation, rabbit monoclonal pS129 antibody (D1R1R, #23706,  
170 Cell Signaling Technology, 1:1000) was prepared in 5% BSA, and incubated overnight at 4°C.  
171 Slides were washed 3x 20 minutes in TBS + 0.03% Triton X-100, and then incubated with anti-  
172 rabbit Alexa Fluor 488 (Invitrogen, 1:2000) and DAPI (TH.GEYER, 5  $\mu$ g/mL) for nuclear staining

173 in 5% BSA for 2 hours at RT, protected from light. During antibody incubation, slides were kept  
174 in a humidity chamber with a hydrophobic barrier around the tissue to prevent them from the  
175 drying out. After the final washing step, the slides were mounted using DAKO fluorescent  
176 mounting medium (DAKO, S3023). The edges of the coverslip were sealed using nail polish.

177

## 178 **8. Neural stem cell differentiation, treatment and immunostaining**

179 Healthy, human induced pluripotent stem cell-derived neural stem cells were propagated and  
180 differentiated using Induction/DOPA Differentiation kit (XCell Science), as previously described  
181 [30]. At day 38 of differentiation, neurons were exposed to human recombinant  $\alpha$ -syn S129A PFFs  
182 (14  $\mu$ g/mL) added to the cell culture medium. After 24 hours, cells were carefully washed in PBS,  
183 and allowed to grow for an additional 6 days in fresh medium before fixation in 4% PFA at day  
184 45. 4 hours prior to fixation, cells were treated with 1  $\mu$ M BI2536 for inhibition of PLK1-3 [17]  
185 or DMSO as a vehicle control. Immunostaining was carried out as described in [23], using the  
186 following primary antibodies: chicken polyclonal MAP2 (#ab92434, Abcam, 1:2000), mouse  
187 monoclonal pS129 (11A5, 1:10,000) and tyrosine hydroxylase (TH, #AB152, Merck Millipore,  
188 1:1000). Appropriate secondary Alexa Flour antibodies (Life Technologies and Abcam) were  
189 diluted 1:1000 and DAPI (TH.GEYER, 5  $\mu$ g/mL) was used for nuclear staining. Coverslips were  
190 mounted with DAKO fluorescent mounting medium (DAKO, S3023) and edges sealed with nail  
191 polish.

192

## 193 **9. Primary neuronal cultures, treatment and immunostaining**

194 Primary hippocampal neurons were prepared from wild type P0 C57Bl6 pups, as previously  
195 described [31]. Briefly, hippocampi were dissected in ice-cold PBS and dissociated using papain  
196 for 20 minutes at 37°C. Hippocampi were then triturated in plating medium (MEM, Gibco,  
197 #51200-020) supplemented with 10% heat-inactivated fetal bovine serum (FBS), 0.5% w/v  
198 glucose, 2.38 mM NaHCO<sub>3</sub>, 1.3  $\mu$ M transferrin (Calbiochem, #616420), 20 mM Glutamax, 86.2  
199  $\mu$ M insulin (Sigma, #I6634) and seeded on Matrigel matrix-coated coverslips (Corning,  
200 #354234). After 24 hours, medium was changed to growth medium (MEM, Gibco, #51200-020)  
201 supplemented with 5% FBS, 0.5% w/v glucose, 2.38 mM NaHCO<sub>3</sub>, 1.3  $\mu$ M transferrin

202 (Calbiochem, #616420), 5 mM Glutamax, 1x B-27 supplement), and at 3 days in-vitro (DIV) glial  
203 proliferation was inhibited with 2  $\mu$ M cytosine arabinoside (Sigma, C6645).

204 At 14 DIV, neurons were treated with the PLK1-3 inhibitor BI2536 (10 nM) for 0-4 hours before  
205 fixation in 4% PFA and processing for immunocytochemistry as previously described [23].  
206 Primary antibodies used were pS129 (D1R1R, #23706, Cell Signaling Technology, 1:1000) and  
207 chicken polyclonal MAP2 (#ab92434, Abcam, 1:1000). Appropriate secondary antibodies (Alexa  
208 Fluor, Life Technologies and Abcam) were diluted 1:1000, and DAPI (TH.GEYER, 5  $\mu$ g/mL) was  
209 added for nuclear staining. Coverslips were mounted with DAKO fluorescent mounting medium  
210 (DAKO, S3023) and edges sealed with nail polish.

211

## 212 **10. Quantification**

213

214 Western blot band density was calculated using ImageJ (National Institutes of Health) after first  
215 assuring that the bands were not saturated. Background was subtracted and the density of each  
216 band normalized to the density of the loading control ( $\beta$ III-tubulin). Quantifications display the  
217 mean of three independent experiments. For immunostainings of organotypic slices (Fig. 2-4), four  
218 images covering the whole slice were taken using the X10 objective on a Zeiss AxioObserver 7  
219 inverted fluorescence microscope fitted with an ApoTome to increase z plane resolution and  
220 analyzed in ImageJ. The focus of each image was adjusted to maximize the amount of visible  
221 aggregate pathology. For each image, tissue area was approximated by selection of DAPI-staining  
222 of the nuclei and expanded 25 pixel units. Aggregates were defined by the MJFR-14-6-4-2  
223 staining; for each image, uneven background was subtracted by the rolling ball algorithm (size =  
224 25 pixels), the image was thresholded using the Auto Threshold plugin (method = RenyiEntropy),  
225 and particles with a minimum size of 6 pixels<sup>2</sup> were counted as aggregates. For comparisons of  
226 aggregate areas, the total aggregate area for each organotypic slice was normalized to its tissue  
227 area. For analysis of fluorescent intensities, the mean fluorescent intensity (MFI) of either the MJF-  
228 14-staining or the pS129-staining was measured inside the MJFR-14-6-4-2-based definition of  
229 aggregates (defined as above) or outside the aggregate definition but inside tissue area. The pS129  
230 fraction defined as “nuclear pS129” when it colocalizes with DAPI staining. The MFI ratio,  
231 defined as pS129 MFI inside aggregates divided by pS129 MFI outside aggregates, was used to  
232 compare the “signal-to-noise” ratio of the pS129-staining before and after PLK2 inhibition.



233 For evaluation of a possible effect of the PLK2i-treatment on spreading of aggregation throughout  
234 the hippocampal slices (Fig. 3), the previous images were stitched together using the Stitching  
235 plugin in Fiji (Fiji Is Just ImageJ, NIH) [32], and the DG and CA1 regions were defined manually  
236 from the DAPI-staining (Fig. 3a). First, the DG was bound by a rectangle, and second, projections  
237 along one side of the rectangle and through one diagonal were used to define the limits of the CA1  
238 region. The subsequent definition of aggregates and analysis of aggregate areas was performed as  
239 described above, based on the MJFR-14-6-4-2 staining.

240 For M83 mouse brain, 2-5 images per brain region were taken randomly with an X10 (2 images,  
241 region at frontal cortex), an X40 oil (3 images, region at DG and CA1 of the hippocampus) or an  
242 X63 oil objective (5 images, region at hind brain). For the regions hippocampus (both DG and  
243 CA1) and frontal cortex (Fig. 5), only baseline nuclear pS129 was assessed, for hindbrain region,  
244 both the nuclear pS129 and the aggregates were both quantified. For analysis, DAPI-staining was  
245 used to define nuclei, and the MFI of nuclear pS129 was computed inside this DAPI-selection. For  
246 quantification of images from the hind brain (where aggregate pathology was present,  
247 Supplementary fig. 3), pS129-positive aggregates were defined by the Auto Threshold plugin  
248 (method = MaxEntropy), with a minimum particle size of 200 pixels<sup>2</sup>. pS129 aggregate MFI was  
249 then measured inside this selection, and pS129 non-aggregate MFI outside this aggregate selection.  
250 Again, the MFI ratio (aggregate-related pS129 divided by non-aggregate pS129) was computed.

251 For human dopaminergic neurons (Fig. 6), 5 X20 images were taken randomly per coverslip. For  
252 each image, the number of nuclei was counted in Fiji using the built-in watershed algorithm, and  
253 the MAP2+ cell area was defined using the Auto Threshold plugin (method = default). pS129-  
254 positive aggregates (inside the MAP2+ cell area) were defined as following: uneven background  
255 was subtracted using the rolling ball algorithm (size = 50 pixels), and aggregates were defined as  
256 signals with a fluorescent intensity minimum 14x above median intensity (of the entire image) and  
257 with a minimum size of 10 pixels<sup>2</sup>. MFI of non-aggregate pS129 was computed as pS129 intensity  
258 outside of aggregates (defined as above), but inside the neuronal cell area. Total aggregate area  
259 per image was normalized to the number of nuclei. A minimum of 2000 cells was analyzed per  
260 condition for each replicate, and two replicates formed the basis for the quantifications.

261 For primary hippocampal neurons (Supplementary fig. 4), 10-15 X20 images were taken per  
262 coverslip, selected based on MAP2-staining to ensure the presence of neurons. Neuronal nuclei

263 were defined by the DAPI-staining co-localized with MAP2-staining, and pS129 MFI inside the  
264 neuronal nuclei was computed in ImageJ.

265

## 266 **11. Statistical analysis**

267

268 Data were tested for normality using the Shapiro-Wilks test, and normally distributed data were  
269 compared using a two-tailed Student's T-test for comparison of two groups or Welch's T-test when  
270 comparing groups with unequal variances. Non-normally distributed data were compared using  
271 the non-parametric two-tailed Mann-Whitney U test. For comparison of multiple groups, one-way  
272 ANOVA was conducted, followed by the Holm-Šidák post hoc test or Fisher's LSD (least  
273 significant difference). Data are presented as means  $\pm$  standard deviation (SD) except where  
274 otherwise mentioned. A p-value below 0.05 was considered significant. \* $p < 0.05$ , \*\* $p < 0.01$ ,  
275 \*\*\* $p < 0.001$ .

276

## 277 **Results**

278 PLK2 is reported to be responsible for phosphorylation of  $\alpha$ -syn in murine brain and may  
279 potentially be responsible for the pS129 phosphorylation of the  $\alpha$ -syn aggregates abundant in PD  
280 and other synucleinopathies. To investigate the role of PLK2 in this process, we used an  
281 organotypic brain slice model where aggregation, pS129 phosphorylation and spreading of  $\alpha$ -  
282 syn pathology is induced via injection of  $\alpha$ -syn S129A-PFF [13], [33] by using pharmacological  
283 inhibition of PLK2.

### 284 **PLK2 inhibition reduces physiological nuclear pS129 levels but does not affect S129- 285 phosphorylation of PFF-induced $\alpha$ -syn aggregates or their formation.**

286 To assess the effect of PLK2 inhibition on PFF-seeded aggregation using OHSCs, slices were  
287 treated continuously with 20  $\mu$ M PLK2i (compound 37), from 24 hours prior to S129A PFFs  
288 injection until the end of experiment. PLK2i was added at each change of medium to ensure  
289 continuous inhibition of PLK2 function during the experiment (Fig. 1a). Seven days following  
290 S129A PFF-injection, slices were collected for biochemical analysis and immunostaining, at which  
291 time point the organotypic slice cultures normally express robust levels of total and pS129  $\alpha$ -syn

292 (Fig. 1b). This time point allows the templating of  $\alpha$ -syn aggregates in neurons at the site of  
293 injection at DG and the spreading of  $\alpha$ -syn aggregate pathology to neurons in the CA3 and CA1  
294 regions as described earlier and the use of S129A PFF can ensure that the signals detected using  
295 antibodies against pS129 is detecting only the de novo generated aggregates in the slices and not  
296 detecting the injected PFF materials as described earlier in [13].

297 Immunoblotting of slice cultures at 7 days post injection (dpi) showed that PLK2i treatment  
298 increased the level of mouse  $\alpha$ -syn in the soluble fraction (Fig. 1c & e) while the level of likely  
299 membrane associated pS129 in the RIPA-soluble fraction was reduced in a PFF-independent  
300 manner (Fig. 1c & d). By contrast, PLK2 inhibition did not affect the formation of insoluble  $\alpha$ -syn  
301 aggregates as detected by immunoblotting using rodent-specific  $\alpha$ -syn antibody D37A6 and pS129  
302 extracted by 7M urea from the of RIPA-insoluble material of PFF-injected slice cultures (Fig. 1f).  
303

304 ***Fig. 1: PLK2i treatment reduces S129-phosphorylated  $\alpha$ -syn in the soluble fraction but not the***  
305 ***insoluble fraction of organotypic slices.*** a) Workflow of the experiment. PLK2 inhibition is started  
306 24 hours before S129A PFF injection and continued until tissue collection at 7 dpi. The timeline  
307 is depicted as days in culture (DIV). b) Immunoblotting of OHSCs from wild type (C57BL/6)  
308 pups, showing expression of endogenous  $\alpha$ -syn and pS129  $\alpha$ -syn at 0, 7 and 14 days in culture,  
309 demonstrating the presence of a basal level of physiological RIPA-soluble pS129  $\alpha$ -syn in the  
310 slices. c) Immunoblotting of the RIPA-soluble fraction of PLK2i- or DMSO-treated slices  $\pm$  PFFs  
311 for pS129 and total  $\alpha$ -syn, demonstrating reduction of pS129 in PLK2i-treated slices in a PFF-  
312 independent manner. d & e) Quantification of immunoblots for pS129 (d) and total  $\alpha$ -syn (e) in  
313 the RIPA-soluble fraction. Band values relative to  $\beta$ III-tubulin were normalized to DMSO/non-  
314 injected group and represent mean  $\pm$  SD, n = 3 independent experiments of 8 to 10 slices per group  
315 in each experiment. Statistical comparisons were performed using one-way ANOVA with Fisher's  
316 LSD as post hoc test, \* p < 0.05, \*\* p < 0.01. P-values for pS129 (d) were 0.004 (DMSO vs.  
317 PLK2i) and 0.007 (PFF+DMSO vs. PFF+PLK2i). P-values for total  $\alpha$ -syn (e) were 0.0498 (DMSO  
318 vs. PLK2i) and 0.6607 (PFF+DMSO vs. PFF+PLK2i). f) Immunoblotting of the RIPA-insoluble  
319 fraction of PFF-injected slices  $\pm$  PLK2i shows that PLK2 inhibition does not affect generation of  
320 aggregates, or S129-phosphorylation of  $\alpha$ -syn in the insoluble fraction. Representative blot from  
321 3 independent experiments. Molecular size markers in kDa are indicated to the right.

322

323 IHC analysis of organotypic slice cultures confirmed the induction of aggregation of endogenous  
324  $\alpha$ -syn following S129A PFF-microinjection. Aggregates were detected by the aggregate-specific  
325  $\alpha$ -syn antibody, MJF-14, and pS129- $\alpha$ -syn (Fig. 2a). Staining for pS129 using the monoclonal  
326 antibody 11A5 revealed two forms of pS129 immunoreactive signals. One is bright and intense,  
327 aggregation-specific pS129-signals that co-localizes with MJF-14-signal and is only detected in  
328 PFF-injected slices (Fig. 2a, arrows). The other type is a fainter, diffuse non-aggregate specific  
329 pS129-signal, which is abundant in nuclei and co-localizes with DAPI-signal but never with MJF-  
330 14-signal, and is detected in both PFF and PBS-injected slices (Fig. 2a, arrowheads) but not in the  
331 PLK2i treated slices. This indicates that PLK2i-treatment significantly reduced the diffuse, nuclear  
332 pS129-signal in both PFF- and PBS-injected slice cultures (Fig. 2a, e). In contrast, PLK2 inhibition  
333 did not influence PFF-induced  $\alpha$ -syn aggregation, as detected with aggregate specific MJF-14  
334 antibody (Fig. 2b, c), and it did not prevent or reduce S129-phosphorylation of the aggregates  
335 generated in axons (Fig. 2d). The lack of dissociation between MJF-14 and pS129-signals in the  
336 PFF-induced aggregates following the PLK2i treatment demonstrates that aggregate-associated  
337 pS129 is unaffected by PLK2 inhibition (Fig. 2). Quantification analysis revealed an  
338 approximately 30% reduction of nuclear pS129 following PLK2i-treatment without reducing  
339 aggregate-specific pS129 inside MJF-14 signals (Fig. 2d & e). This led to an approximate doubling  
340 of the signal-to-noise ratio of aggregate-specific pS129 signal, thereby facilitating the study of  
341 pS129 positive  $\alpha$ -syn aggregates without interference of non-aggregate-specific pS129 (Fig. 2f).

342

343 ***Fig. 2: PLK2i treatment of OHSCs does not affect generation of pS129 positive aggregates, but***  
344 ***reduces the nuclear pS129 intensity.*** a) Representative images from the dentate gyrus region (DG)  
345 of organotypic slices injected with PBS or S129A PFFs and treated with DMSO or PLK2i. Slices  
346 were stained with MJF-14, pS129 (11A5), and DAPI, scale bar = 50  $\mu$ m. i. The magnified region  
347 (white boxed area) shows nuclear pS129 signal that co-localizes with DAPI (arrowheads). ii. The  
348 nuclear pS129-staining was removed following PLK2i treatment. iii. S129A PFF-induced  $\alpha$ -syn  
349 aggregates, phosphorylated at S129, are detected with MJF-14 and pS129 antibodies (arrows).  
350 pS129-staining of non-aggregated  $\alpha$ -syn is also seen, predominantly located in the nuclei  
351 (arrowheads). iiiii. PLK2i treatment shows no effect on the S129-phosphorylation of aggregated  $\alpha$ -

352 syn (arrows) but effectively reduces the nuclear pS129-staining. Scale bars = 20  $\mu$ m. b)  
353 Quantification of the amount of aggregation (aggregate area normalized to tissue area), defined by  
354 MJF-14 staining (p-value = 0.09). c-d) Quantification of the mean fluorescence intensity of  $\alpha$ -syn  
355 aggregates detected with MJF-14 (c, p-value = 0.712) and aggregate-specific pS129 that overlaps  
356 with MJF-14 (d, p-value = 0.214). e) Quantification of nuclear (non-aggregate related) pS129,  
357 illustrating a significant decrease in mean fluorescence intensity following PLK2i-treatment (p-  
358 value = 0.0087). f) Relative ratio of aggregate-specific pS129/nuclear pS129 in PFF-injected slices  
359 shows an increase of ratio of the signals of aggregates/background following PLK2i treatment,  
360 due to reduction of the non-aggregate-related nuclear pS129-signal (p-value = 0.009). Bars  
361 represent mean  $\pm$  SD of 3 independent experiments with 8 to 10 slices/experiment. Treatments  
362 were compared using an unpaired Student's T-test.

363

### 364 **PLK2 inhibition does not hinder inter-neuronal spreading of PFF-induced $\alpha$ -syn aggregates**

365 To test the influence of PLK2 inhibition on the spreading of PFF-induced  $\alpha$ -syn aggregate  
366 pathology, aggregate signals at CA1 region was identified for quantification (Fig. 3a). PLK2i-  
367 treatment of slices showed no significant influence on aggregates formed at CA1 following the  
368 PFF injection in the DG when compared to DMSO-treated slices and their phosphorylation as  
369 determined by aggregate- and pS129-specific antibodies (Fig. 3b, arrow), but instead only reduced  
370 the nuclear pS129 signals (arrow head) (Fig. 3b-d). A tendency towards increased pathology load  
371 was observed, as also seen in Fig. 2b, although this was not statistically significant. To obtain a  
372 measure for the relative inter-neuronal spreading in each slice, the aggregate signal at CA1 was  
373 normalized to the aggregate signal at DG (Fig. 3e).

374

375 ***Fig. 3: Inter-neuronal spreading of  $\alpha$ -syn aggregate pathology from the DG to the CA1 region***  
376 ***occurs independently of PLK2 inhibition.*** a) Segmentation of DG and CA1 regions in organotypic  
377 hippocampal slices labelled with DAPI, shown in gray scale. The DG is bounded manually by a  
378 box, and the CA1 regions is afterwards defined by extrapolation of one side of the DG box and a  
379 diagonal line through the box. Scale bar = 200  $\mu$ m. b) Immunostaining of S129A PFF-injected  
380 OHSCs showing aggregated  $\alpha$ -syn at the CA1 region 7 dpi detected by both MJF-14 and pS129.  
381 PLK2i-treatment reduces the nuclear pS129-signal at CA1 that overlaps with DAPI (arrowheads)

382 but has no influence on the PFF-induced aggregate-specific pS129-signal that overlaps with MJF-  
383 14-signal (arrows). Scale bars = 50  $\mu$ m. c-d) Quantification of  $\alpha$ -syn aggregate area (MJF-14 area  
384 normalized to tissue area) at the DG (c) and CA1 region (d) shows no significant effects on  
385 aggregation at both regions following PLK2i treatment. e) Aggregate levels at the CA1 region  
386 were normalized to aggregate levels in DG of the same slice to address the relative spreading of  
387 S129A PFF-induced  $\alpha$ -syn aggregates, based on MJF-14 staining. PLK2i treatment did not affect  
388 relative spreading of MJF14-positive pathology (p-value = 0.829 using an unpaired Welch's T  
389 test). Bars represent mean  $\pm$  SD of 5-6 slices per group. Images are representative of three  
390 independent experiments.

391

392 As PLK2 inhibition did not affect either the PFF induced aggregation, S129 phosphorylation or  
393 spreading of  $\alpha$ -syn aggregates, but only diminished the diffuse nuclear pS129-signal in our slice  
394 cultures setup, we tested whether short-term treatment of slices with PLK2i would reveal the same  
395 result. Treatment of OHSCs with PLK2i or the PLK1-3 inhibitor (BI2536) for 24 hours prior to  
396 fixation reduced nuclear pS129 intensity, with a concomitant increase of the signal-to-noise ratio  
397 of aggregate-specific pS129-signal similar to the continuous PLK2 inhibition during the culture  
398 period (Fig. 4).

399

400 ***Fig. 4: 24 hours treatment of OHSCs with either polo-like kinase inhibitor reduces the nuclear***  
401 ***pS129-signal.*** a) Experimental setup, with addition of PLK2i or PLK1-3 inhibitor (BI2536) to the  
402 medium 24 hours prior to slice collection. b) Immunostaining with MJF-14, pS129 (11A5) and  
403 DAPI, shows the reduction of nuclear pS129-staining (arrowheads) in PLK2i and BI2536 treated  
404 slices, while aggregate-specific pS129-staining that colocalizes with MJF-14-signals remains.  
405 Scale bars = 50  $\mu$ m for the left column and 20  $\mu$ m for the magnified inserts in three rightmost  
406 columns. c) Quantification showing an increase in the ratio of mean fluorescence intensity between  
407 aggregate-specific pS129 and nuclear pS129 signal following treatment with PLK2i (p-value =  
408 0.0039) or BI2536 (p-value = 0.0467). No difference was observed between PLK2i and BI2536  
409 (p-value = 0.3060). Graph displays mean  $\pm$  SD of 6 – 8 slices per group. Statistical comparisons  
410 were performed using one-way ANOVA with Fisher's LSD test, \* p < 0.05, \*\* p < 0.01. Images  
411 are representative of three independent experiments.

412 **PLK2 inhibition reduces nuclear pS129 signal in the M83 model of synucleinopathy as well**  
413 **as in human neurons**

414 To further substantiate the efficacy of a short-term PLK2 inhibition paradigm as a method to  
415 facilitate easier detection of  $\alpha$ -syn aggregate pathology by the reduction of non-aggregate specific  
416 pS129 signals, we treated 15-month-old heterozygous A53T- $\alpha$ -syn transgenic mice (M83<sup>+/-</sup>) with  
417 PLK2i for 48 hours before sacrifice. Aggregate pathology in the models was initiated by injection  
418 of mouse recombinant PFFs in the hind limb gastrocnemius muscle at 12 months [29].  
419 Immunostaining of the brain using anti-pS129 antibody showed a significant reduction in nuclear  
420 pS129 intensity as demonstrated in representative images from hippocampus and frontal cortex  
421 (Fig. 5a-c). The level of reduction varied between regions, with nuclear pS129  $\alpha$ -syn of pyramidal  
422 neurons of the CA1 region in the hippocampus appearing particularly sensitive to PLK2 inhibition  
423 (Fig. 5a, d). In contrast, the frontal cortex appeared to contain both PLK2i-sensitive and PLK2i-  
424 resistant nuclear pS129-signals (Fig. 5c, f). Quantification the pS129-positive aggregated fibrillary  
425 signals detected in the hind brain region showed that treatment of the mice with PLK2i for 48  
426 hours – unsurprisingly – had no effect compared to the control group, considering the short time  
427 of the treatment (Supplementary fig. 3a & b). However, PLK2 inhibition strikingly increased the  
428 signal-to-noise ratio, facilitating the detection of aggregate-specific signals in the PLK2i treated  
429 mice (Supplementary fig. 3c).

430

431 ***Fig. 5: PLK2i treatment for 48 hours before sacrifice reduces nuclear pS129-staining in PFF-***  
432 ***injected M83 mice.*** a-c) Representative immunostaining images from brain sections the of 15-  
433 month-old M83 mice – 3 months following PFF injection in the hindlimbs – stained with pS129  
434 (D1R1R) and DAPI. CA1 region (a) and the DG (b) of hippocampus, and the frontal cortex (c),  
435 showing particularly strong pS129-staining at pyramidal neurons of the CA1 region. 48-hour  
436 PLK2i treatment by oral gavage (2 x 100 mg/kg/day) significantly reduces nuclear pS129 staining  
437 in all regions, although some PLK2i resistant S129-phosphorylation is apparent in the frontal  
438 cortex. Scale bars = 50  $\mu$ m. d-f) Quantification of the mean fluorescence intensity of nuclear  
439 pS129-signal in CA1 (d, p-value = 0.0028), DG (e, p-value = 0.0102) and frontal cortex (f, p-value  
440 = 0.0009) demonstrate reduction of pS129 nuclear intensity following PLK2 inhibition. Bars

441 represent the mean  $\pm$  SD, n = 5 mice in each group. \* p < 0.05, \*\* p < 0.01, as determined by an  
442 unpaired Student's T test.

443

444 We also conducted a short-term PLK2 inhibition on cultured human dopaminergic neurons, where  
445 aggregation of endogenous  $\alpha$ -syn was initiated by adding  $\alpha$ -syn S129A PFFs (Fig. 6a). Addition  
446 of PLK1-3 inhibitor (BI2536) four hours before fixing the cells effectively reduced nuclear pS129  
447 intensity, especially in the tyrosine hydroxylase-positive neurons, which displayed intense nuclear  
448 pS129-staining in DMSO-treated cultures (Fig. 6b & c). No modulation of aggregate levels  
449 following PLK2 inhibition was identified in the cultures treated with S129A PFFs (Fig. 6b & d).  
450 Collectively, these results highlight the ability of short-term PLK2 inhibition prior to fixation to  
451 improve the signal-to-noise ratio of aggregate-related pS129-signal across model systems from  
452 neuronal cultures to ex vivo tissue slices and in vivo models.

453

454 ***Fig. 6: Inhibition of PLK2 reduces the nuclear pS129-signal in human dopaminergic neurons***  
455 ***derived from iPSCs.*** a) Workflow of the experiment where the PLK1-3 inhibitor (BI2536) was  
456 added 4 h before fixing the cells for ICC. b) Representative images of iPSC-derived mature  
457 neurons visualized using MAP2 as a pan-neuronal marker, TH as dopaminergic neuronal marker,  
458 pS129 (11A5) and DAPI as a nuclear counterstain. For DMSO-treated cells, the staining shows  
459 bright nuclear pS129-signals (arrowheads), which disappear when cells are treated with BI2536,  
460 leaving the aggregate-specific pS129-staining easily detectable (arrows). Scale bars = 20  $\mu$ m. c)  
461 Quantification of the average nuclear pS129 intensity in DMSO- and BI2536-treated cultures after  
462 exposure to PFFs shows decreased intensity in the BI2536 group (p-value = 0.0002). A minimum  
463 of 4000 cells were analyzed per group. Data are shown as mean  $\pm$  SEM, and significance is  
464 indicated as \*\*\* p<0.001 using an unpaired Welch's T test. d) Quantification of pS129 aggregate  
465 area normalized to the number of nuclei shows no difference between DMSO- and BI2536-treated  
466 cultures after exposure to PFFs (p-value = 0.5079). Data are shown as mean  $\pm$  SEM, and  
467 significance is tested with a Mann-Whitney test.

468



469 To further explore how short a period of PLK2 inhibition is needed to reduce nuclear pS129 levels,  
470 we tested PLK inhibition from 10 minutes to 4 hours prior to fixation and analysis in primary  
471 hippocampal neurons (Supplementary fig. 4a). As little as 30 minutes treatment with 10 nM  
472 BI2536 prior to fixation was sufficient to decrease nuclear pS129 staining to a minimal level,  
473 which remained unchanged at 2 and 4 hours of treatment (Supplementary fig. 4b & c). As indicated  
474 in Supplementary fig. 4b, the nuclear pS129 staining is not removed completely upon treatment of  
475 the neuronal culture using BI2536, but it facilitates the study of the pS129-positive aggregates by  
476 increasing the signal-to-noise ratio as demonstrated in our cell, tissue and in vivo models.

477

## 478 **Discussion**

479 The phosphorylation of  $\alpha$ -syn at serine 129 has for almost two decades been recognized as a  
480 prominent characteristic of pathological  $\alpha$ -syn aggregates not only in human tissue but also in cell  
481 and animal models of  $\alpha$ -syn aggregate pathology [3],[4],[34],[35],[36],[37],[38]. However, the  
482 exact role of S129-phosphorylation remains contested due to conflicting results from various cell  
483 and in vivo studies [6], [7], [8], [9], [10], [11], [12],[13]. Those conflicting results are believed to  
484 be due to the use of models where either  $\alpha$ -syn or the studied kinases are over expressed or expressed  
485 in a mutated forms, including our own earlier report where mutated form of  $\alpha$ -syn (S129G) that  
486 cannot be phosphorylated at S129 residue were expressed using viral vectors in organotypic slices  
487 made from SNCA genes knock out pups [13].

488 In the current paper, we investigate whether PLK2, which has been identified as an efficient S129-  
489 directed kinase in rodent brains [4],[17],[19],[20],[22], is truly a kinase responsible for S129-  
490 phosphorylation of  $\alpha$ -syn aggregates, and if we can modulate the PFF induced  $\alpha$ -syn pathology  
491 and the associated pS129 level by pharmacological inhibition of PLK2 using a set up that expresses  
492 both  $\alpha$ -syn and PLK2 in a physiological levels.

493 As inhibitors, the specific PLK2 inhibitor, compound 37 [21],[23],[24], which has been validated  
494 earlier in our lab [23] and the PLK1-3 inhibitor BI2536 were used [17],[25], [39], [40]. Both are  
495 efficient inhibitors of PLK2 but whereas compound 37 is highly specific and well tolerated, it has  
496 to be custom synthesized. BI2536, on the other hand, is commercially available but reported to be  
497 toxic to mitotic cells [8], [40].

498 The low toxicity of compound 37 allowed us to treat the PFF-seeded organotypic slice cultures  
499 throughout the duration of the whole experiment. This demonstrated that inhibition of PLK2 does  
500 not affect the accumulation of aggregate-specific pS129. In contrast, PLK2 inhibition reduced the  
501 RIPA-soluble fraction of pS129 and elevated the level of soluble  $\alpha$ -syn, corroborating earlier data  
502 reported where PLK2 inhibition led to increased  $\alpha$ -syn level by increasing its transcription [23].  
503 Our data are in line with a recently published study using GFP-  $\alpha$ -syn mice crossed with PLK2  
504 knock-out mice and other study from the same group that opted for pharmacological inhibition of  
505 PLK2 in zebra fish, demonstrating that PLK2 deletion or inhibition had no influence on S129-  
506 phosphorylation and aggregates formation [41], [42].

507  
508 Prompted by the apparent potential of PLK2 inhibition to facilitate pS129 aggregate detection in  
509 immunostainings, we tested the effect of short-term PLK2 inhibitor treatment paradigms in various  
510 PFF-seeded models. In organotypic slices, identical results were obtained with short-term  
511 treatment of slices for 24 hours using either compound 37 or BI2536. The treatment with PLK2i  
512 and BI2536 was equally able to reduce nuclear pS129 staining in M83<sup>+/-</sup> and human neuronal  
513 models following treatment for 48 hours and 4 hours prior to tissue or cell collection, respectively.  
514 In none of the models did the short-term PLK2 inhibition affect the phosphorylation of aggregated  
515  $\alpha$ -syn.

516 Interestingly, PLK2i treatment of M83<sup>+/-</sup> model demonstrated a striking regional variance in the  
517 reduction of nuclear pS129. This could be explained by differences in the expression level of PLK2  
518 in various neuronal subtypes in different brain regions of mice [43],[44], [45] and is corroborated  
519 by the varying effect of PLK2i on total pS129 levels in different parts of the mouse brain [22].

520 As the detection of pS129 in inclusions is often used as a readout to quantify aggregate formation  
521 and the effect of strategies directed to counteract this process [34], [36],[37], [38], [46], the  
522 presence of non-aggregate-associated pS129-signals represents a confounding signal that requires  
523 segmentation of immunofluorescence images. Based on our results, we propose short-term  
524 treatment with a specific PLK2i or BI2536 as an easy and efficient strategy to improve signal-to-  
525 noise ratios when quantifying aggregate-associated pS129 signals. A time-course analysis of  
526 BI2536-treated hippocampal neurons demonstrated efficient reduction in nuclear pS129 after as  
527 little as 30 minutes of treatment (Supplementary fig. 4). This timeframe is well in line with  
528 previous studies of the post-mortem stability of physiological pS129, where complete

529 dephosphorylation is observed within 30 minutes of sacrifice, at which time point the  
530 kinase/phosphatase equilibrium is shifted towards dephosphorylation [3]. In contrast, aggregate-  
531 specific pS129 is a stable modification, prevalent in post-mortem patient brains many hours after  
532 death [3],[4].

533 Naturally, attention must be paid to other effects of the short-term PLK2 inhibition that was not  
534 tested here, but if the treatment is brief and the primary read-out is  $\alpha$ -syn aggregates, which are  
535 considered fairly stable structures as demonstrated in the tested models in this study, then this  
536 concern should be of minor importance.

537 The presence of S129-phosphorylated  $\alpha$ -syn in the nucleus has been questioned due to the reported  
538 off-target and non-specific binding of commercially available  $\alpha$ -syn and pS129 antibodies [47],  
539 [48], [49], [50]. Nonetheless, others have validated the presence of soluble endogenous pS129  $\alpha$ -  
540 syn in the nucleus using antibodies with a high affinity to pS129 epitopes or using combination of  
541 different pS129 antibodies [20],[49],[51], [52]. With this in mind, the validity of the pS129-  
542 staining detected with the 11A5 antibody used in this study [4] was tested using slices from  $\alpha$ -syn  
543 knock-out (ASKO) pups that do not express  $\alpha$ -syn. Immunostaining of ASKO slices showed no  
544 off-target signals (Supplementary fig. 2) in accordance with our earlier data obtained by western  
545 blotting using 11A5 in ASKO slices [33], substantiating the specificity of 11A5 antibody and  
546 corroborating a previous validation of nuclear pS129. Our finding of physiological, non-pathology  
547 related pS129  $\alpha$ -syn is consistent with numerous studies of both in vitro and in vivo models,  
548 reporting the nuclear localization. Although our data do not identify the roles of nuclear pS129  $\alpha$ -  
549 syn, they provide a novel experimental strategy to investigate this enigmatic  $\alpha$ -syn species that has  
550 been associated to processes covering histone acetylation, neurotoxicity, transcriptional regulation  
551 and repair of double-strand DNA breaks [6], [20], [51], [53], [54], [55], [56], [57].

## 552 **Conclusion:**

553 The findings of this study demonstrate that PLK2 is involved in significant S129-phosphorylation  
554 of physiological  $\alpha$ -syn but not the phosphorylation of serine-129 on aggregated  $\alpha$ -syn. Moreover,  
555 short-term PLK2 inhibition can be used as an easy experimental procedure to facilitate specific  
556 detection of aggregated  $\alpha$ -syn in different models of templated  $\alpha$ -syn pathology.

557

558

559

## 560 **References**

561 1. Spillantini MG, Schmidt ML, Lee VMY, Trojanowski JQ, Jakes R, Goedert M.  $\alpha$ -synuclein in  
562 Lewy bodies [8]. *Nature*. 1997;388:839–40.

563 2. Oueslati A, Fournier M, Lashuel HA. Role of post-translational modifications in modulating  
564 the structure, function and toxicity of  $\alpha$ -synuclein. Implications for Parkinson's disease  
565 pathogenesis and therapies. *Prog Brain Res*. 2010;183:115–45.

566 3. Fujiwara H, Hasegawa M, Dohmae N, Kawashima A, Masliah E, Goldberg MS, et al. A-  
567 Synuclein Is Phosphorylated in Synucleinopathy Lesions. *Nat Cell Biol*. 2002;4:160–4.

568 4. Anderson JP, Walker DE, Goldstein JM, De Laat R, Banducci K, Caccavello RJ, et al.  
569 Phosphorylation of Ser-129 is the dominant pathological modification of  $\alpha$ -synuclein in familial  
570 and sporadic lewy body disease. *J Biol Chem*. 2006;281:29739–52.

571 5. Kim WS, Kagedal K, Halliday GM. Alpha-synuclein biology in Lewy body diseases.  
572 *Alzheimer's Res. Ther*. 2014.

573 6. Gorbatyuk OS, Li S, Sullivan LF, Chen W, Kondrikova G, Manfredsson FP, et al. The  
574 phosphorylation state of Ser-129 in human alpha-synuclein determines neurodegeneration in a  
575 rat model of Parkinson disease. *Proc Natl Acad Sci U S A* [Internet]. 2008;105:763–8. Available  
576 from: <http://www.pnas.org/content/105/2/763>

577 7. Paleologou KE, Schmid AW, Rospigliosi CC, Kim HY, Lamberto GR, Fredenburg RA, et al.  
578 Phosphorylation at Ser-129 but not the phosphomimics S129E/D inhibits the fibrillation of ??-  
579 synuclein. *J Biol Chem*. 2008;283:16895–905.

580 8. Kragh CL, Lund LB, Febbraro F, Hansen HD, Wei-Ping G, El-Agnaf O, et al.  $\alpha$ -synuclein  
581 aggregation and Ser-129 phosphorylation-dependent cell death in oligodendroglial cells. *J Biol*  
582 *Chem*. 2009;284:10211–22.

583 9. Febbraro F, Sahin G, Farran A, Soares S, Jensen PH, Kirik D, et al. Ser129D mutant alpha-  
584 synuclein induces earlier motor dysfunction while S129A results in distinctive pathology in a rat

- 585 model of Parkinson's disease. *Neurobiol Dis.* 2013;56:47–58.
- 586 10. Oueslati A, Schneider BL, Aebischer P, Lashuel HA. Polo-like kinase 2 regulates selective  
587 autophagic synuclein clearance and suppresses its toxicity in vivo. *Proc Natl Acad Sci U S A*  
588 [Internet]. 2013;110:E3945–54. Available from:  
589 <http://www.pnas.org/cgi/doi/10.1073/pnas.1309991110>
- 590 11. Chen L, Feany MB. Alpha-synuclein phosphorylation controls neurotoxicity and inclusion  
591 formation in a *Drosophila* model of Parkinson disease. *Nat Neurosci.* 2005;8:657–63.
- 592 12. da Silveira SA, Schneider BL, Cifuentes-Diaz C, Sage D, Abbas-Terki T, Iwatsubo T, et al.  
593 Phosphorylation does not prompt, nor prevent, the formation of  $\alpha$ -synuclein toxic species in a rat  
594 model of Parkinson's disease. *Hum Mol Genet.* 2009;18:872–87.
- 595 13. Elfarrash S, Jensen NM, Ferreira N, Betzer C, Thevathasan JV, Diekmann R, et al.  
596 Organotypic slice culture model demonstrates inter-neuronal spreading of alpha-synuclein  
597 aggregates. *Acta Neuropathol Commun.* 2019;7.
- 598 14. Okochi M, Walter J, Koyama A, Nakajo S, Baba M, Iwatsubo T, et al. Constitutive  
599 phosphorylation of the Parkinson's disease associated  $\alpha$ - synuclein. *J Biol Chem.* 2000;275:390–  
600 7.
- 601 15. Waxman EA, Giasson BI. Specificity and Regulation of Casein Kinase-Mediated  
602 Phosphorylation of ??-Synuclein. *J Neuropathol Exp Neurol.* 2008;PAP:402–16.
- 603 16. Qing H, Wong W, McGeer EG, McGeer PL. Lrrk2 phosphorylates alpha synuclein at serine  
604 129: Parkinson disease implications. *Biochem Biophys Res Commun.* 2009;387:149–52.
- 605 17. Waxman EA, Giasson BI. Characterization of kinases involved in the phosphorylation of  
606 aggregated  $\alpha$ -synuclein. *J Neurosci Res.* 2011;89:231–47.
- 607 18. Dzamko N, Zhou J, Huang Y, Halliday GM. Parkinson's disease-implicated kinases in the  
608 brain; insights into disease pathogenesis. *Front Mol Neurosci.* 2014;7.
- 609 19. Inglis KJ, Chereau D, Brigham EF, Chiou SS, Schöbel S, Frigon NL, et al. Polo-like kinase 2  
610 (PLK2) phosphorylates  $\alpha$ -synuclein at serine 129 in central nervous system. *J Biol Chem.*  
611 2009;284:2598–602.

- 612 20. Mbefo MK, Paleologou KE, Boucharaba A, Oueslati A, Schell H, Fournier M, et al.  
613 Phosphorylation of synucleins by members of the polo-like kinase family. *J Biol Chem*.  
614 2010;285:2807–22.
- 615 21. Bowers S, Truong AP, Ye M, Aubele DL, Sealy JM, Neitz RJ, et al. Design and synthesis of  
616 highly selective, orally active Polo-like kinase-2 (Plk-2) inhibitors. *Bioorganic Med Chem Lett*.  
617 2013;23:2743–9.
- 618 22. Bergeron M, Motter R, Tanaka P, Fauss D, Babcock M, Chiou S s., et al. In vivo modulation  
619 of polo-like kinases supports a key role for PLK2 in Ser129  $\alpha$ -synuclein phosphorylation in  
620 mouse brain. *Neuroscience* [Internet]. IBRO; 2014;256:72–82. Available from:  
621 <http://dx.doi.org/10.1016/j.neuroscience.2013.09.061>
- 622 23. Kofoed RH, Zheng J, Ferreira N, Lykke-Andersen S, Salvi M, Betzer C, et al. Polo-like  
623 kinase 2 modulates  $\alpha$ -synuclein protein levels by regulating its mRNA production. *Neurobiol Dis*  
624 [Internet]. 2017;106:49–62. Available from:  
625 <https://linkinghub.elsevier.com/retrieve/pii/S0969996117301419>
- 626 24. Aubele DL, Hom RK, Adler M, Galemno RA, Bowers S, Truong AP, et al. Selective and  
627 brain-permeable polo-like kinase-2 (Plk-2) inhibitors that reduce  $\alpha$ -synuclein phosphorylation in  
628 rat brain. *ChemMedChem*. 2013;8:1295–313.
- 629 25. Johnson EF, Stewart KD, Woods KW, Giranda VL, Luo Y. Pharmacological and functional  
630 comparison of the polo-like kinase family: Insight into inhibitor and substrate specificity.  
631 *Biochemistry*. 2007;46:9551–63.
- 632 26. Stoppini L, Buchs P-A, Muller D. A simple method for organotypic cultures of nervous  
633 tissue. *J Neurosci Methods* [Internet]. 1991;37:173–82. Available from:  
634 <http://linkinghub.elsevier.com/retrieve/pii/016502709190128M>
- 635 27. Bahr BA. Long-term hippocampal slices: A model system for investigating synaptic  
636 mechanisms and pathologic processes. *J Neurosci Res*. 1995;42:294–305.
- 637 28. Jensen PH, Islam K, Kenney J, Nielsen MS, Power J, Gai WP. Microtubule-associated  
638 protein 1B is a component of cortical Lewy bodies and binds  $\alpha$ -synuclein filaments. *J Biol*  
639 *Chem*. 2000;

- 640 29. Sacino AN, Brooks M, Thomas MA, McKinney AB, Lee S, Regenhardt RW, et al.  
641 Intramuscular injection of  $\alpha$ -synuclein induces CNS  $\alpha$ -synuclein pathology and a rapid-onset  
642 motor phenotype in transgenic mice. *Proc Natl Acad Sci U S A*. 2014;111:10732–7.
- 643 30. Bogetofte H, Jensen P, Ryding M, Schmidt SI, Okarmus J, Ritter L, et al. PARK2 mutation  
644 causes metabolic disturbances and impaired survival of human iPSC-derived neurons. *Front Cell*  
645 *Neurosci*. 2019;13.
- 646 31. Betzer C, Lassen LB, Olsen A, Kofoed RH, Reimer L, Gregersen E, et al. Alpha-synuclein  
647 aggregates activate calcium pump SERCA leading to calcium dysregulation. *EMBO Rep*.  
648 2018;19.
- 649 32. Preibisch S, Saalfeld S, Tomancak P. Globally optimal stitching of tiled 3D microscopic  
650 image acquisitions. *Bioinformatics*. 2009;25:1463–5.
- 651 33. Elfarrash S, Jensen PH. Organotypic hippocampal slices , an emerging tool to model  
652 synucleinopathies. *Neural Regen Res*. 2021;16:999–1000.
- 653 34. Abdelmotilib H, Maltbie T, Delic V, Liu Z, Hu X, Fraser KB, et al.  $\alpha$ -Synuclein fibril-  
654 induced inclusion spread in rats and mice correlates with dopaminergic Neurodegeneration.  
655 *Neurobiol Dis*. 2017;105:84–98.
- 656 35. Luk KC, Kehm VM, Zhang B, O'Brien P, Trojanowski JQ, Lee VMY. Intracerebral  
657 inoculation of pathological  $\alpha$ -synuclein initiates a rapidly progressive neurodegenerative  $\alpha$ -  
658 synucleinopathy in mice. *J Exp Med*. 2012;209:975–88.
- 659 36. Mahul-Mellier A-LL, Burtscher J, Maharjan N, Weerens L, Croisier M, Kuttler F, et al. The  
660 process of Lewy body formation, rather than simply  $\alpha$ -synuclein fibrillization, is one of the  
661 major drivers of neurodegeneration. *Proc Natl Acad Sci U S A* [Internet]. 2020;117:4971–82.  
662 Available from: <http://www.ncbi.nlm.nih.gov/pubmed/32075919>
- 663 37. Masuda-Suzukake M, Nonaka T, Hosokawa M, Oikawa T, Arai T, Akiyama H, et al. Prion-  
664 like spreading of pathological  $\alpha$ -synuclein in brain. *Brain*. 2013;136:1128–38.
- 665 38. Volpicelli-Daley LA, Luk KC, Patel TP, Tanik SA, Riddle DM, Stieber A, et al. Exogenous  
666  $\alpha$ -Synuclein Fibrils Induce Lewy Body Pathology Leading to Synaptic Dysfunction and Neuron  
667 Death. *Neuron* [Internet]. Elsevier Inc.; 2011;72:57–71. Available from:

- 668 <http://dx.doi.org/10.1016/j.neuron.2011.08.033>
- 669 39. Lénárt P, Petronczki M, Steegmaier M, Di Fiore B, Lipp JJ, Hoffmann M, et al. The Small-  
670 Molecule Inhibitor BI 2536 Reveals Novel Insights into Mitotic Roles of Polo-like Kinase 1.  
671 *Curr Biol.* 2007;17:304–15.
- 672 40. Steegmaier M, Hoffmann M, Baum A, Lénárt P, Petronczki M, Krššák M, et al. BI 2536, a  
673 Potent and Selective Inhibitor of Polo-like Kinase 1, Inhibits Tumor Growth In Vivo. *Curr Biol.*  
674 2007;17:316–22.
- 675 41. Weston LJ, Stackhouse TL, Spinelli KJ, Boutros SW, Rose EP, Osterberg VR, et al. Genetic  
676 deletion of Polo-like kinase 2 reduces alpha-synuclein serine-129 phosphorylation in presynaptic  
677 terminals but not Lewy bodies. *J Biol Chem.* 2021;100273.
- 678 42. Weston LJ, Cook ZT, Stackhouse TL, Sal MK, Schultz BI, Tobias ZJC, et al. In vivo  
679 aggregation of presynaptic alpha-synuclein is not influenced by its phosphorylation at serine-  
680 129. *Neurobiol Dis* [Internet]. Elsevier Inc.; 2021;152:105291. Available from:  
681 <https://doi.org/10.1016/j.nbd.2021.105291>
- 682 43. Lein ES, Hawrylycz MJ, Ao N, Ayres M, Bensinger A, Bernard A, et al. Genome-wide atlas  
683 of gene expression in the adult mouse brain. *Nature.* 2007;445:168–76.
- 684 44. Simmons DL, Neel BG, Stevens R, Evett G, Erikson RL. Identification of an early-growth-  
685 response gene encoding a novel putative protein kinase. *Mol Cell Biol.* 1992;12:4164–9.
- 686 45. Kauselmann G, Weiler M, Wulff P, Jessberger S, Konietzko U, Scafidi J, et al. The polo-like  
687 protein kinases Fnk and Snk associate with a Ca<sup>2+</sup>- and integrin-binding protein and are  
688 regulated dynamically with synaptic plasticity. *EMBO J.* 1999;18:5528–39.
- 689 46. Henderson MX, Cornblath EJ, Darwich A, Zhang B, Brown H, Gathagan RJ, et al. Spread of  
690  $\alpha$ -synuclein pathology through the brain connectome is modulated by selective vulnerability and  
691 predicted by network analysis. *Nat Neurosci.* 2019;22:1248–57.
- 692 47. Huang Z, Xu Z, Wu Y, Zhou Y. Determining nuclear localization of alpha-synuclein in  
693 mouse brains. *Neuroscience.* 2011;199:318–32.
- 694 48. Kumar ST, Jagannath S, Francois C, Vanderstichele H, Stoops E, Lashuel HA. How specific



- 695 are the conformation-specific  $\alpha$ -synuclein antibodies? Characterization and validation of 16  $\alpha$ -  
696 synuclein conformation-specific antibodies using well-characterized preparations of  $\alpha$ -synuclein  
697 monomers, fibrils and oligomers with distinct struct. *Neurobiol Dis.* 2020;146.
- 698 49. Delic V, Chandra S, Abdelmotilib H, Maltbie T, Wang S, Kem D, et al. Sensitivity and  
699 specificity of phospho-Ser129  $\alpha$ -synuclein monoclonal antibodies. *J Comp Neurol* [Internet].  
700 2018;526:1978–90. Available from:  
701 <http://www.ncbi.nlm.nih.gov/pubmed/21858823><http://doi.wiley.com/10.1002/cne.24468>
- 702 50. Rutherford NJ, Brooks M, Giasson BI. Novel antibodies to phosphorylated  $\alpha$ -synuclein  
703 serine 129 and NFL serine 473 demonstrate the close molecular homology of these epitopes.  
704 *Acta Neuropathol Commun.* 2016;4:80.
- 705 51. Schell H, Hasegawa T, Neumann M, Kahle PJ. Nuclear and neuritic distribution of serine-  
706 129 phosphorylated  $\alpha$ -synuclein in transgenic mice. *Neuroscience* [Internet]. IBRO;  
707 2009;160:796–804. Available from: <http://dx.doi.org/10.1016/j.neuroscience.2009.03.002>
- 708 52. Landeck N, Hall H, Ardah MT, Majbour NK, El-Agnaf OMA, Halliday G, et al. A novel  
709 multiplex assay for simultaneous quantification of total and S129 phosphorylated human alpha-  
710 synuclein. *Mol Neurodegener.* 2016;11.
- 711 53. Courte J, Bousset L, Boxberg Y Von, Villard C, Melki R, Peyrin J-M. The expression level  
712 of alpha-synuclein in different neuronal populations is the primary determinant of its prion-like  
713 seeding. *Sci Rep* [Internet]. 2020;10:4895. Available from:  
714 <http://www.nature.com/articles/s41598-020-61757-x>
- 715 54. Maroteaux L, Campanelli JT, Scheller RHR. Synuclein: A neuron-specific protein localized  
716 to the nucleus and presynaptic nerve terminal. *J Neurosci.* 1988;8:2804–15.
- 717 55. McLean PJ, Ribich S, Hyman BT. Subcellular localization of  $\alpha$ -synuclein in primary  
718 neuronal cultures: Effect of missense mutations. *J Neural Transm Suppl.* 2000. p. 53–63.
- 719 56. Pinho R, Paiva I, Jerčić KG, Fonseca-Ornelas L, Gerhardt E, Fahlbusch C, et al. Nuclear  
720 localization and phosphorylation modulate pathological effects of alpha-synuclein. *Hum Mol*  
721 *Genet.* 2019;28:31–50.
- 722 57. Schaser AJ, Osterberg VR, Dent SE, Stackhouse TL, Wakeham CM, Boutros SW, et al.

723 Alpha-synuclein is a DNA binding protein that modulates DNA repair with implications for  
724 Lewy body disorders. Sci Rep. 2019;9.

725

## 726 **Supplementary figures**

727 **Supplementary fig. 1: Characterization of the mouse recombinant PFFs injected in M83**  
728 **mice.** a) Biochemical characterization of mouse PFFs. The insoluble fibrils consist of pure  $\alpha$ -syn  
729 as demonstrated by SDS-PAGE and Coomassie blue staining (P = pellet, S = supernatant). b) The  
730 sonicated mouse PFFs comprise a homogeneous, mono-dispersed particle population with a 38.8  
731 nm radius as determined by dynamic light scattering (DLS). c) The amyloid nature of the PFFs  
732 was confirmed by a robust K114 fluorometric signal detected at 550 nm. In comparison,  
733 monomeric  $\alpha$ -syn did not produce any signal.

734

735 **Supplementary fig. 2: Validation of pS129 antibody (11A5) for immunostaining.** In OHSCs  
736 made from  $\alpha$ -syn knock out (ASKO) pups and injected with S129A PFFs, immunostaining using  
737 pS129 (11A5) yields no signal at 7 dpi. In comparison, slices from WT (C57BL/6) pups injected  
738 with S129A PFFs demonstrate a nuclear pS129-signal that co-localizes with DAPI signals,  
739 predominantly in the pyramidal neurons of the CA3 and CA1 region of hippocampus  
740 (arrowheads). The nuclear signals are more diffuse and less bright than the PFF-induced axonal  $\alpha$ -  
741 syn aggregate signals (arrows). Scale bar = 100  $\mu$ m. i and ii. Magnified inserts show the bright  
742 distinct PFF-induced aggregates (arrows) and more diffuse non-aggregate-specific nuclear pS129  
743 signal (arrowheads). Scale bars = 20  $\mu$ m.

744

745

746 **Supplementary fig. 3: 48 hours PLK2i treatment of M83 mice has no influence on the**  
747 **generated  $\alpha$ -syn aggregates.** a) Representative images of  $\alpha$ -syn aggregates detected in the hind  
748 brain of M83 mice, scale bar = 50  $\mu$ m. b) Quantification of the pS129 aggregate area normalized  
749 to tissue area. Aggregate amount is unaffected by PLK2i treatment (p-value = 0.3075 using an  
750 unpaired Welch's T test). c) PLK2i treatment facilitates easier detection of pS129-positive

751 aggregates, as the ratio of mean fluorescence intensity of pS129 between aggregates and non-  
752 aggregate nuclear signal increases drastically upon treatment (p-value < 0.0001 by a Mann-  
753 Whitney test). Bars represent the mean  $\pm$  SD, n = 5 mice per group.

754

755 **Supplementary fig. 4: PLK2 inhibition reduces the intensity of nuclear pS129 staining in as**

756 **little as 30 minutes.** a) Experimental overview for the determination of PLK2 inhibition time  
757 course in primary hippocampal neurons. b) Representative images from hippocampal neurons  
758 cultured for 14 days and treated with 10 nM BI2536 for 0-4 hours prior to fixation. A minimum  
759 of 30 minutes treatment was sufficient to effectively decrease nuclear pS129 but not remove it  
760 completely, as is demonstrated by the increased exposure images on the right. Scale bars = 20  
761  $\mu$ m. c) Quantification of nuclear pS129-staining shows a plateauing of mean fluorescence  
762 intensity after 30 minutes of BI2536 (p-value = 0.0185). No decrease in nuclear pS129 was  
763 detected with 10 minutes treatment (p-value = 0.4028). Bars represent mean  $\pm$  SD from 2  
764 independent replicates and significance is indicated as \* p<0.05 by one-way ANOVA followed  
765 by Holm-Šidák posttest.

766

**a**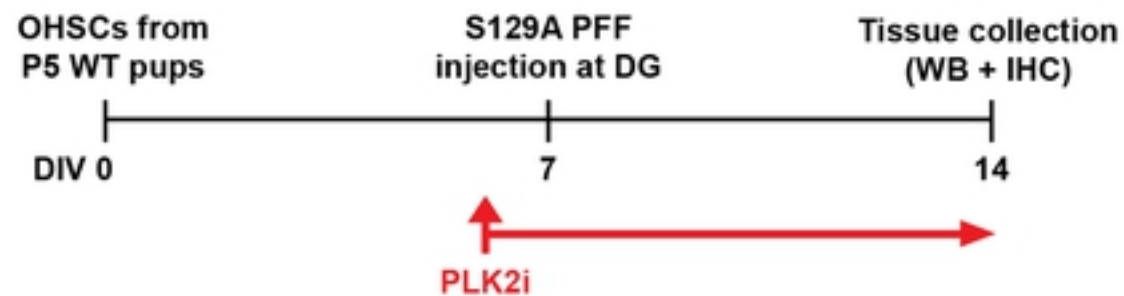**b**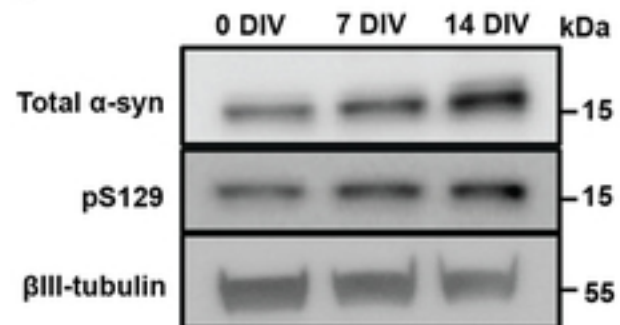**c**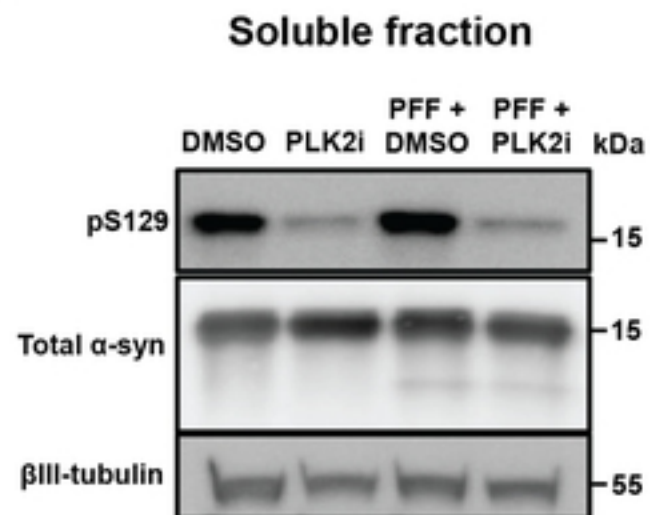**d**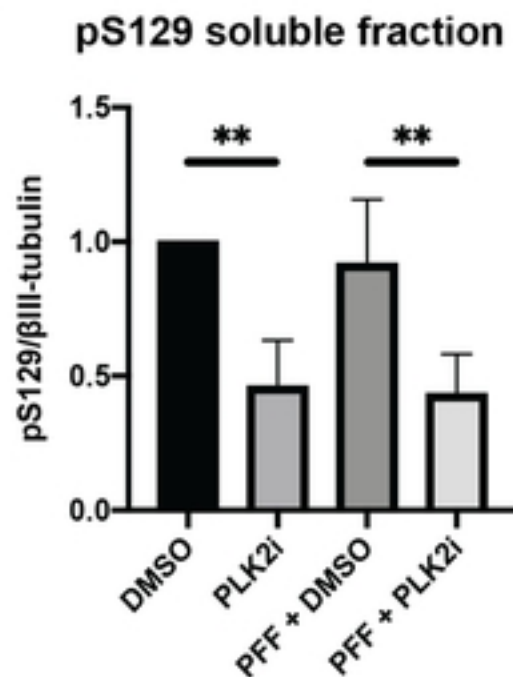**e**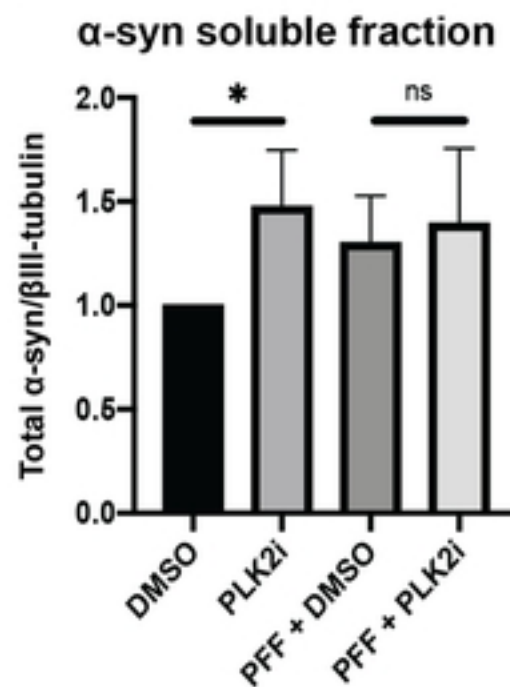**f**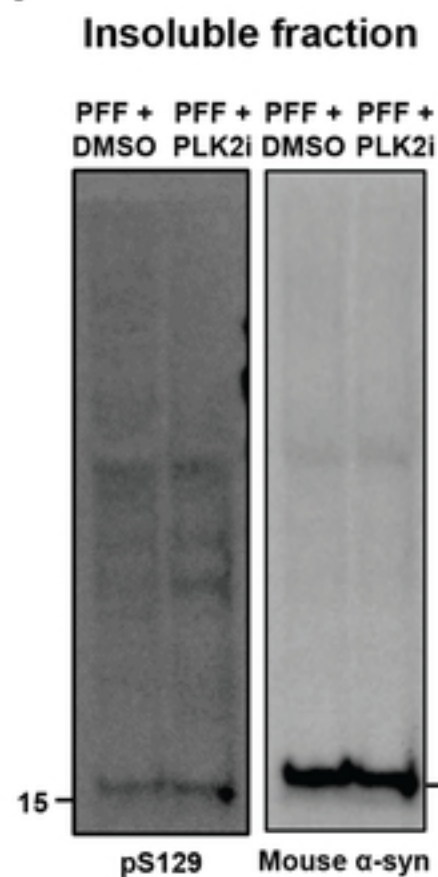

Figure

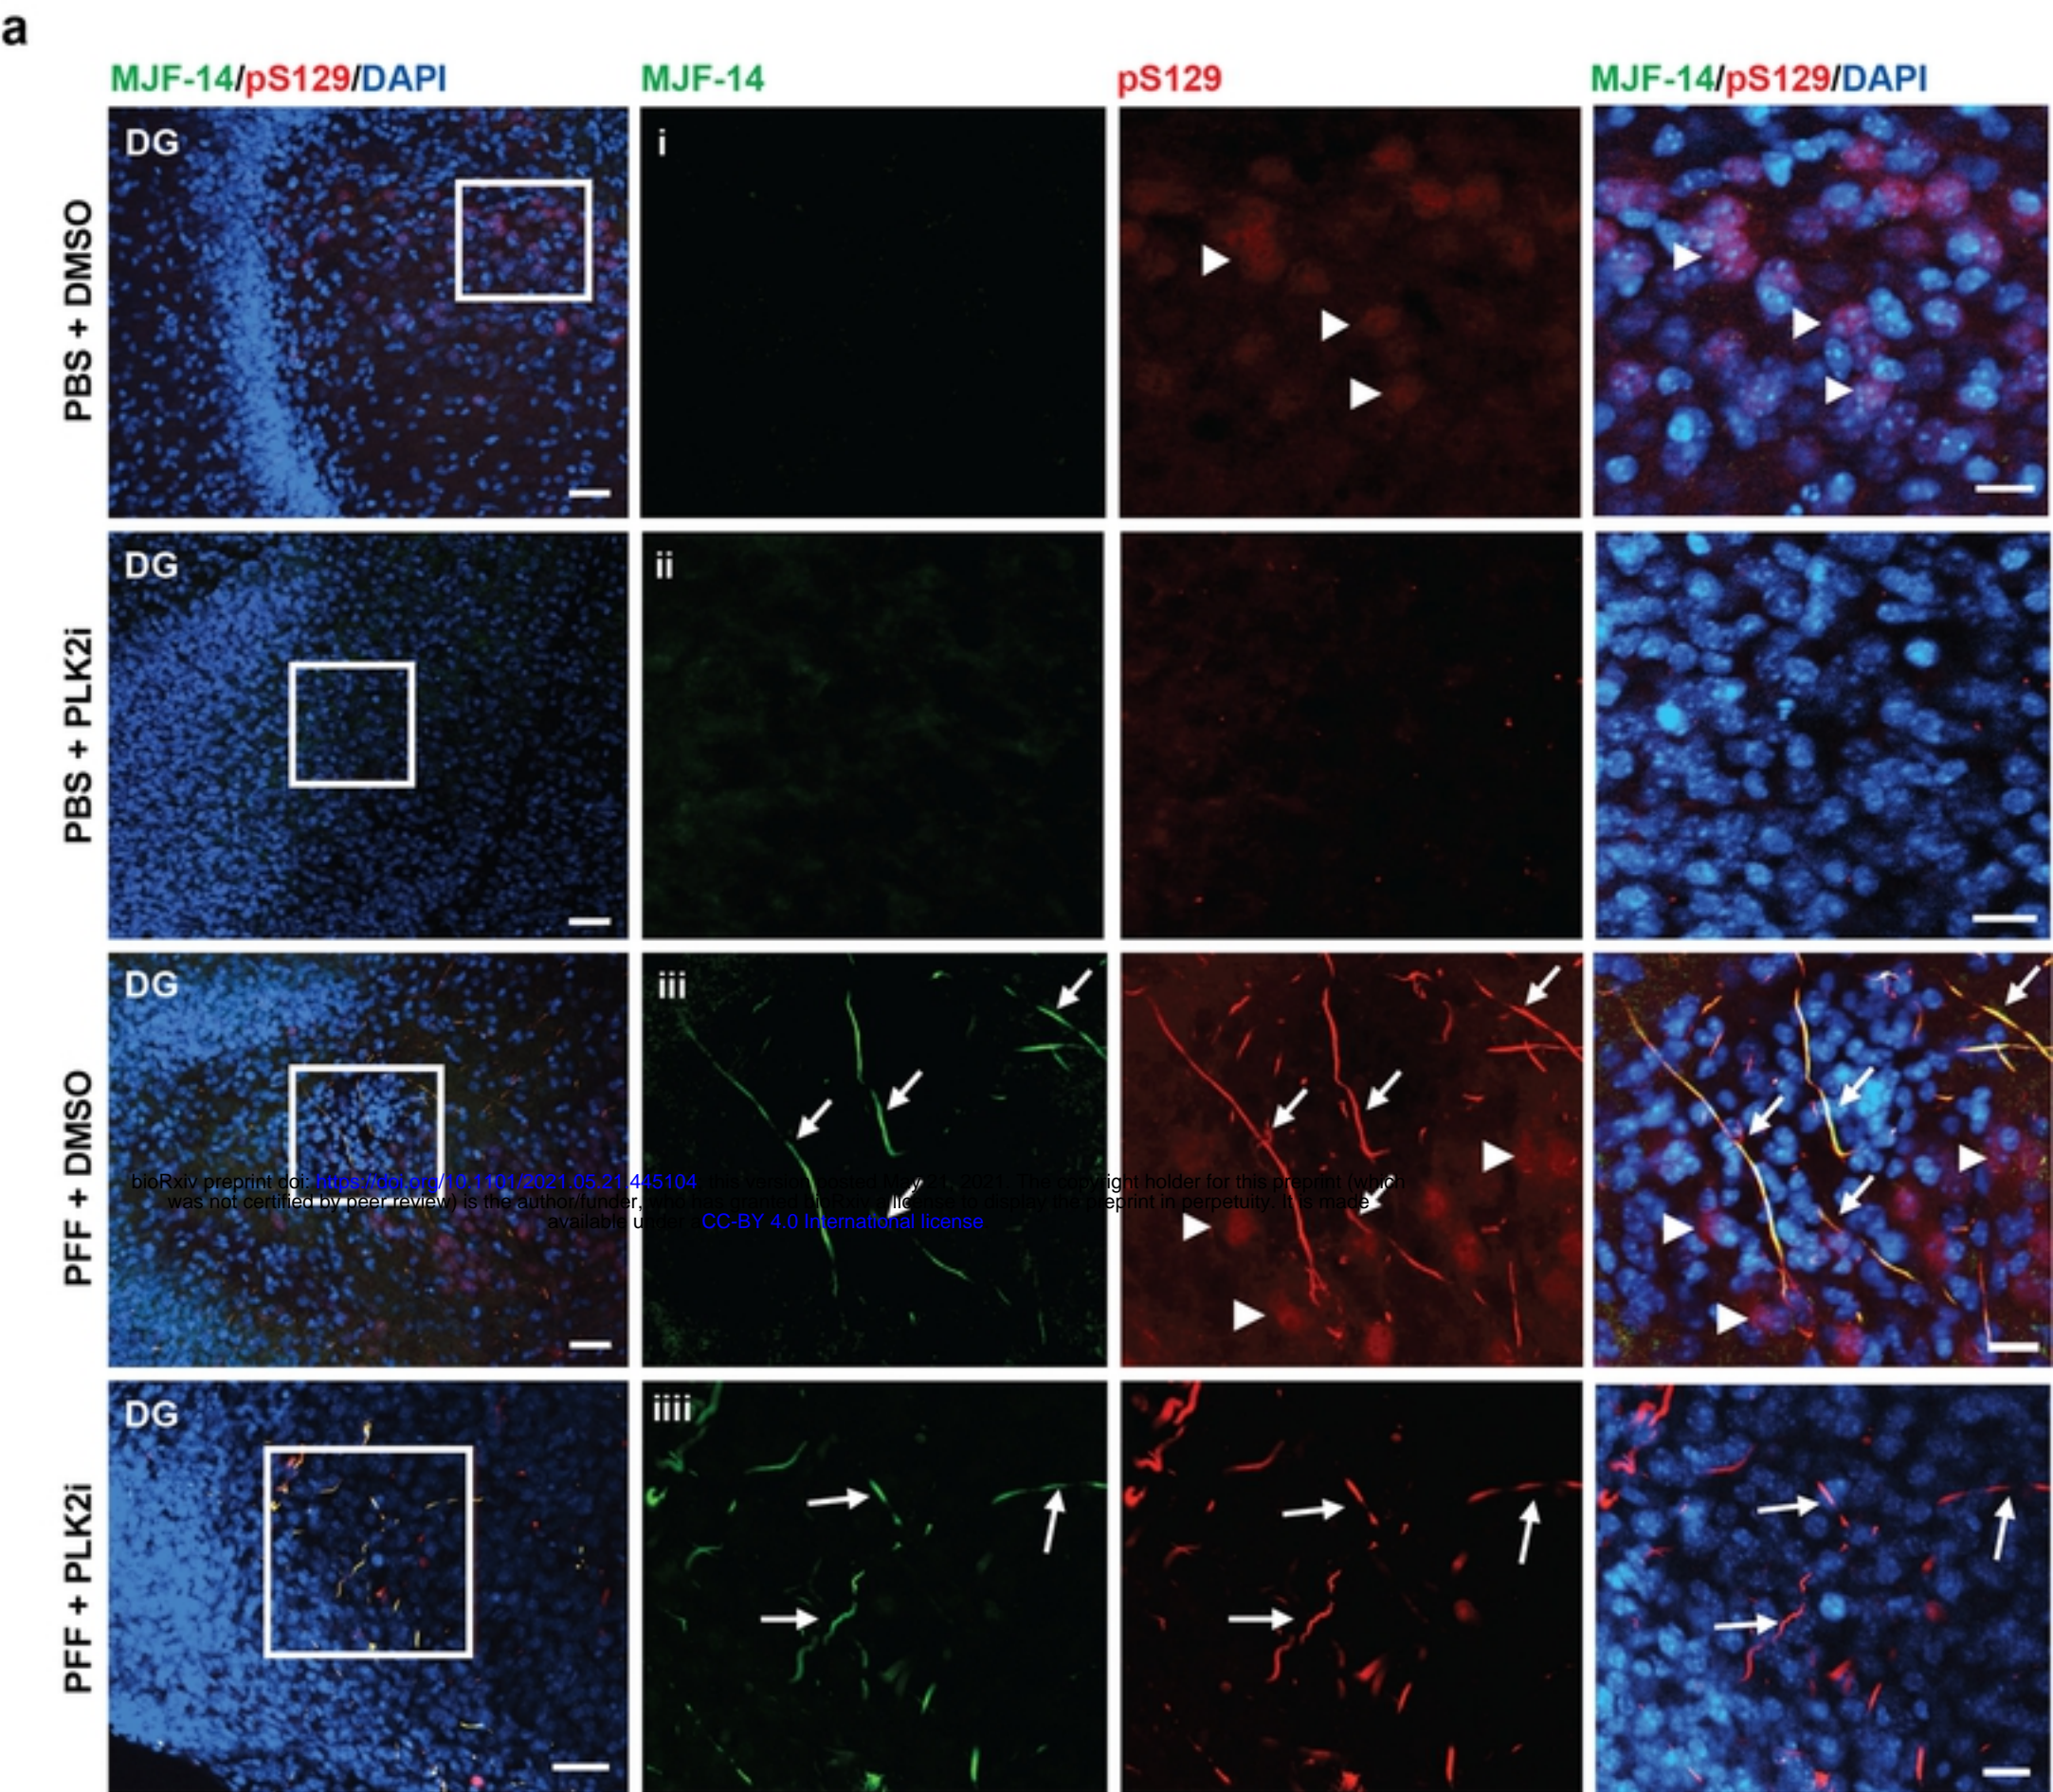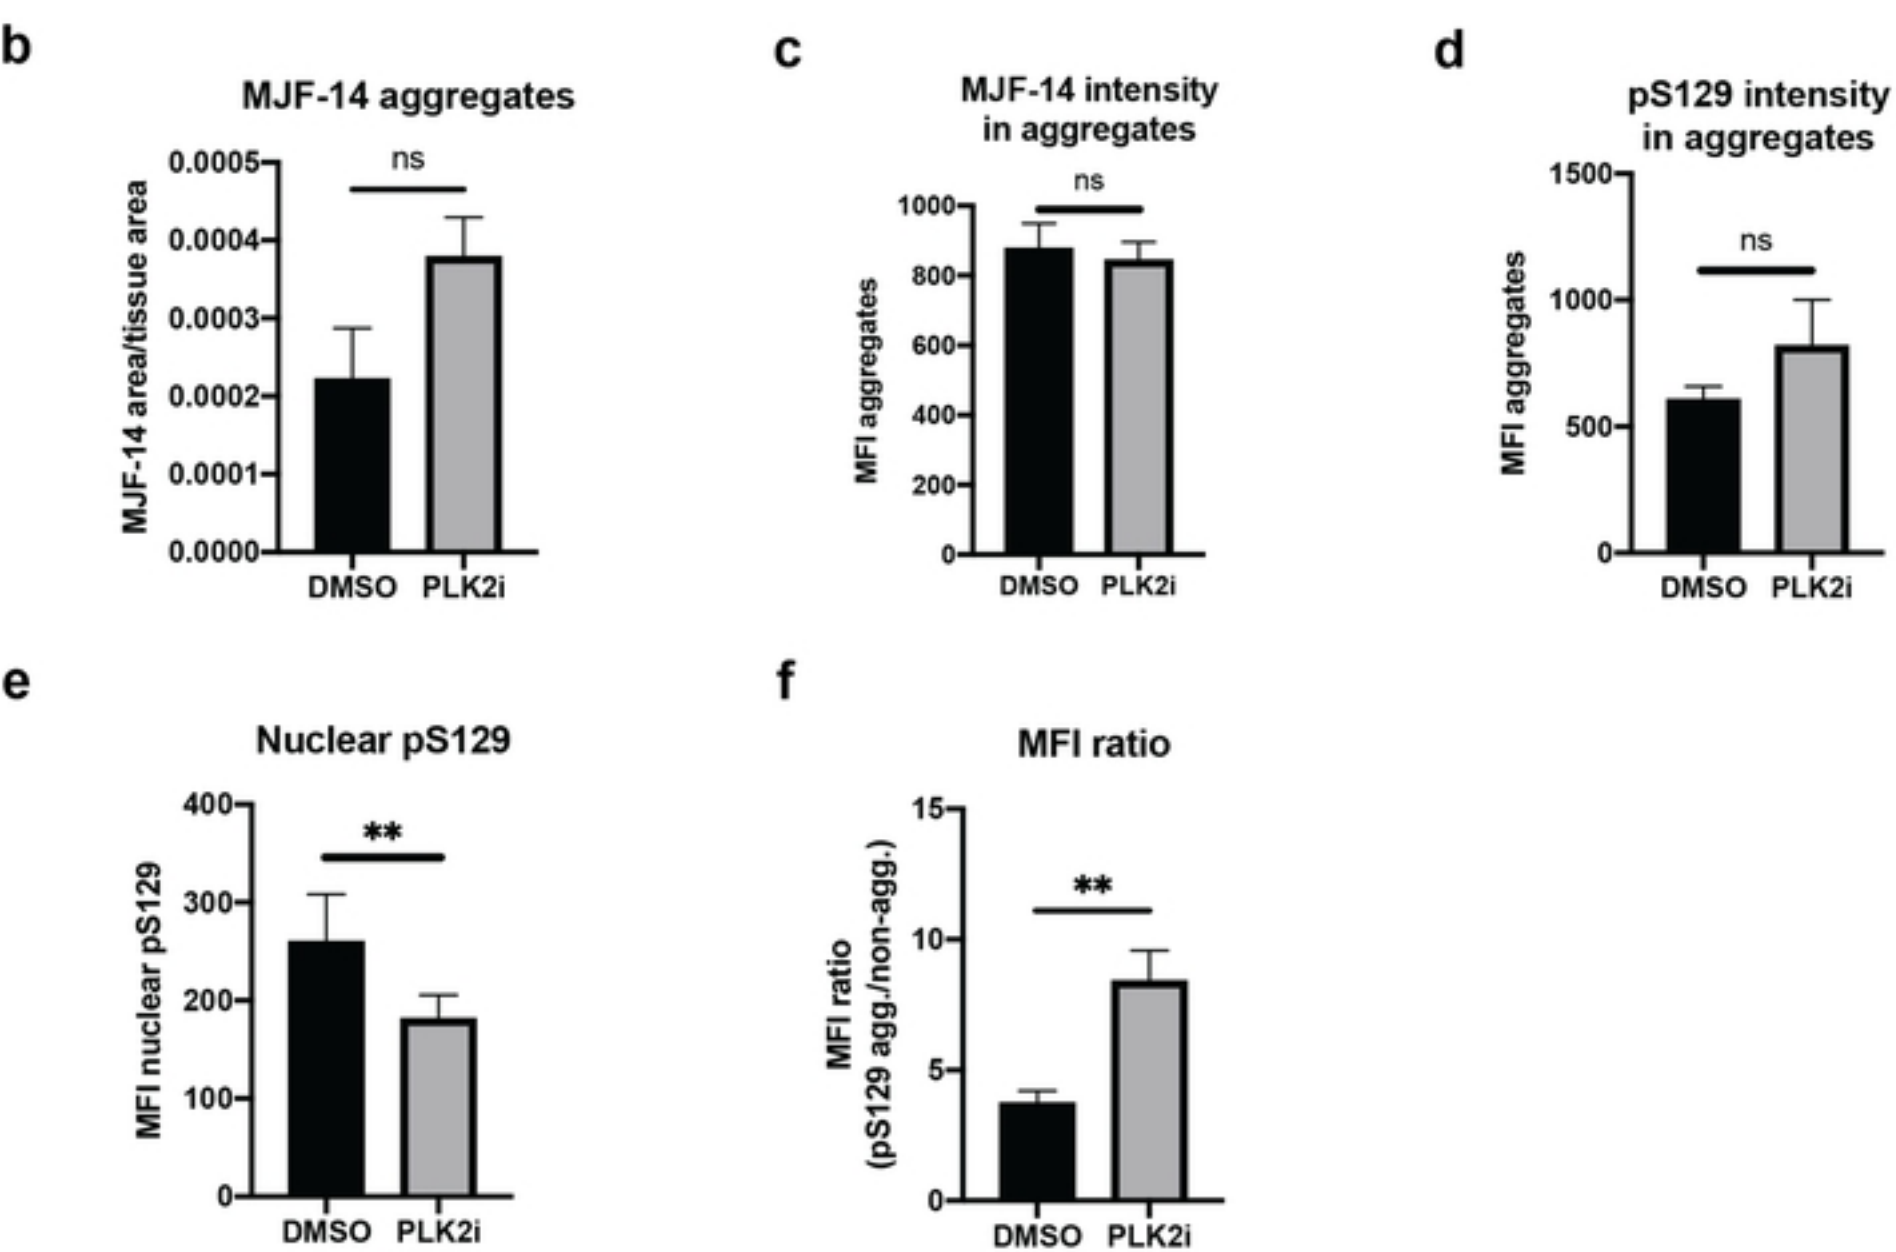

Figure

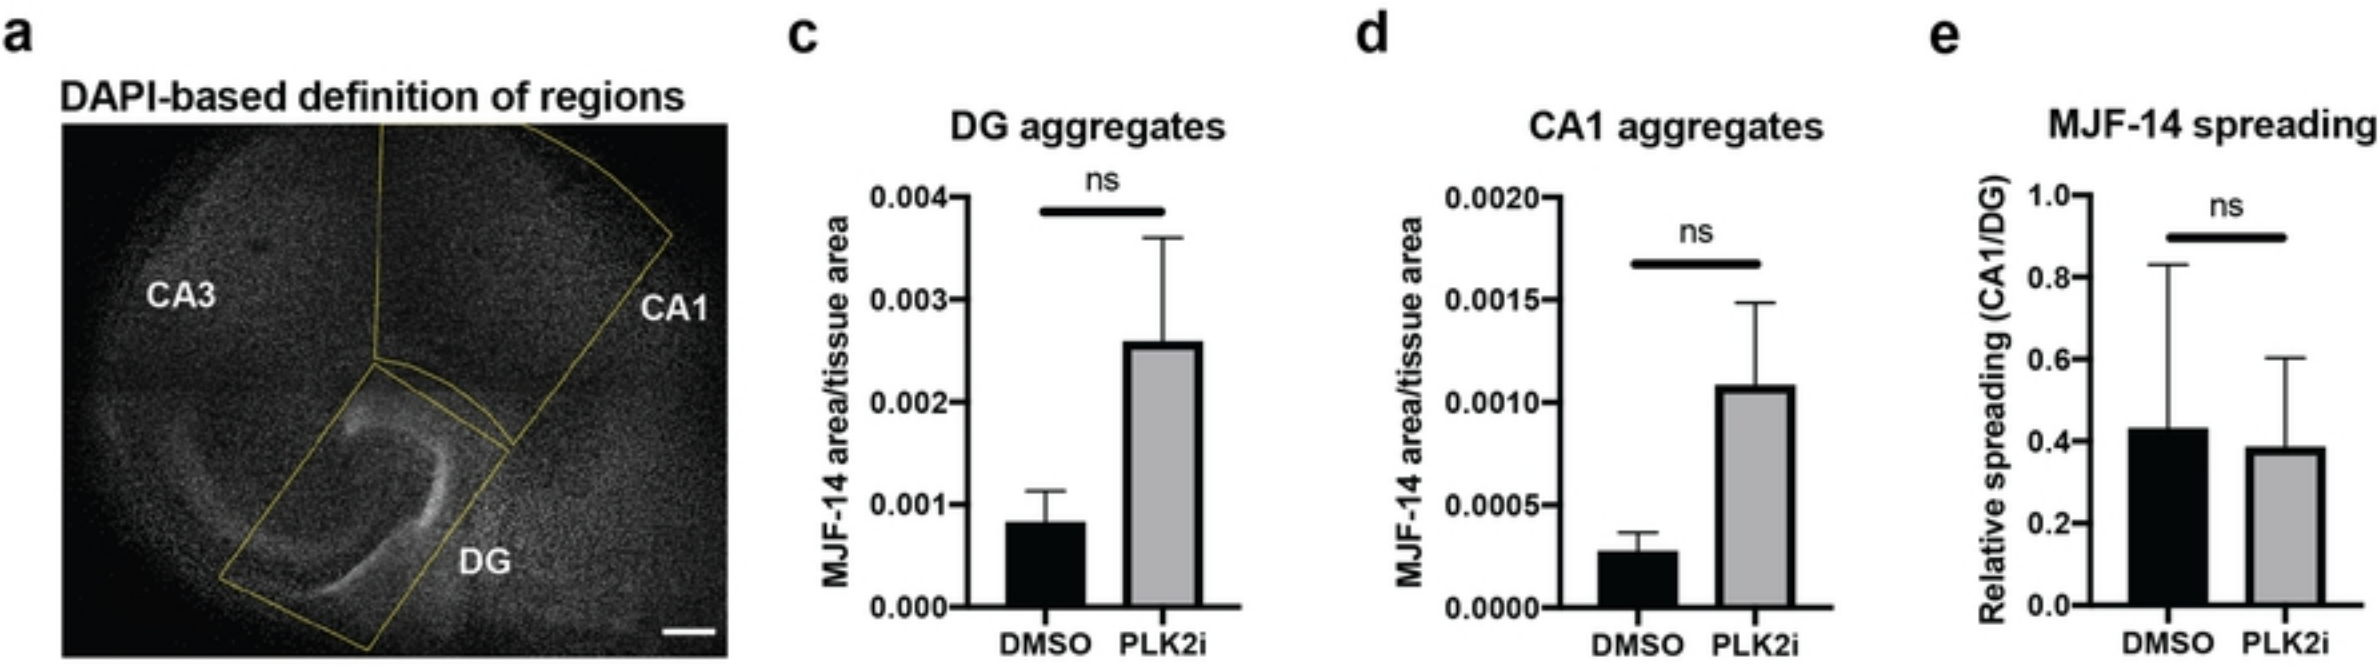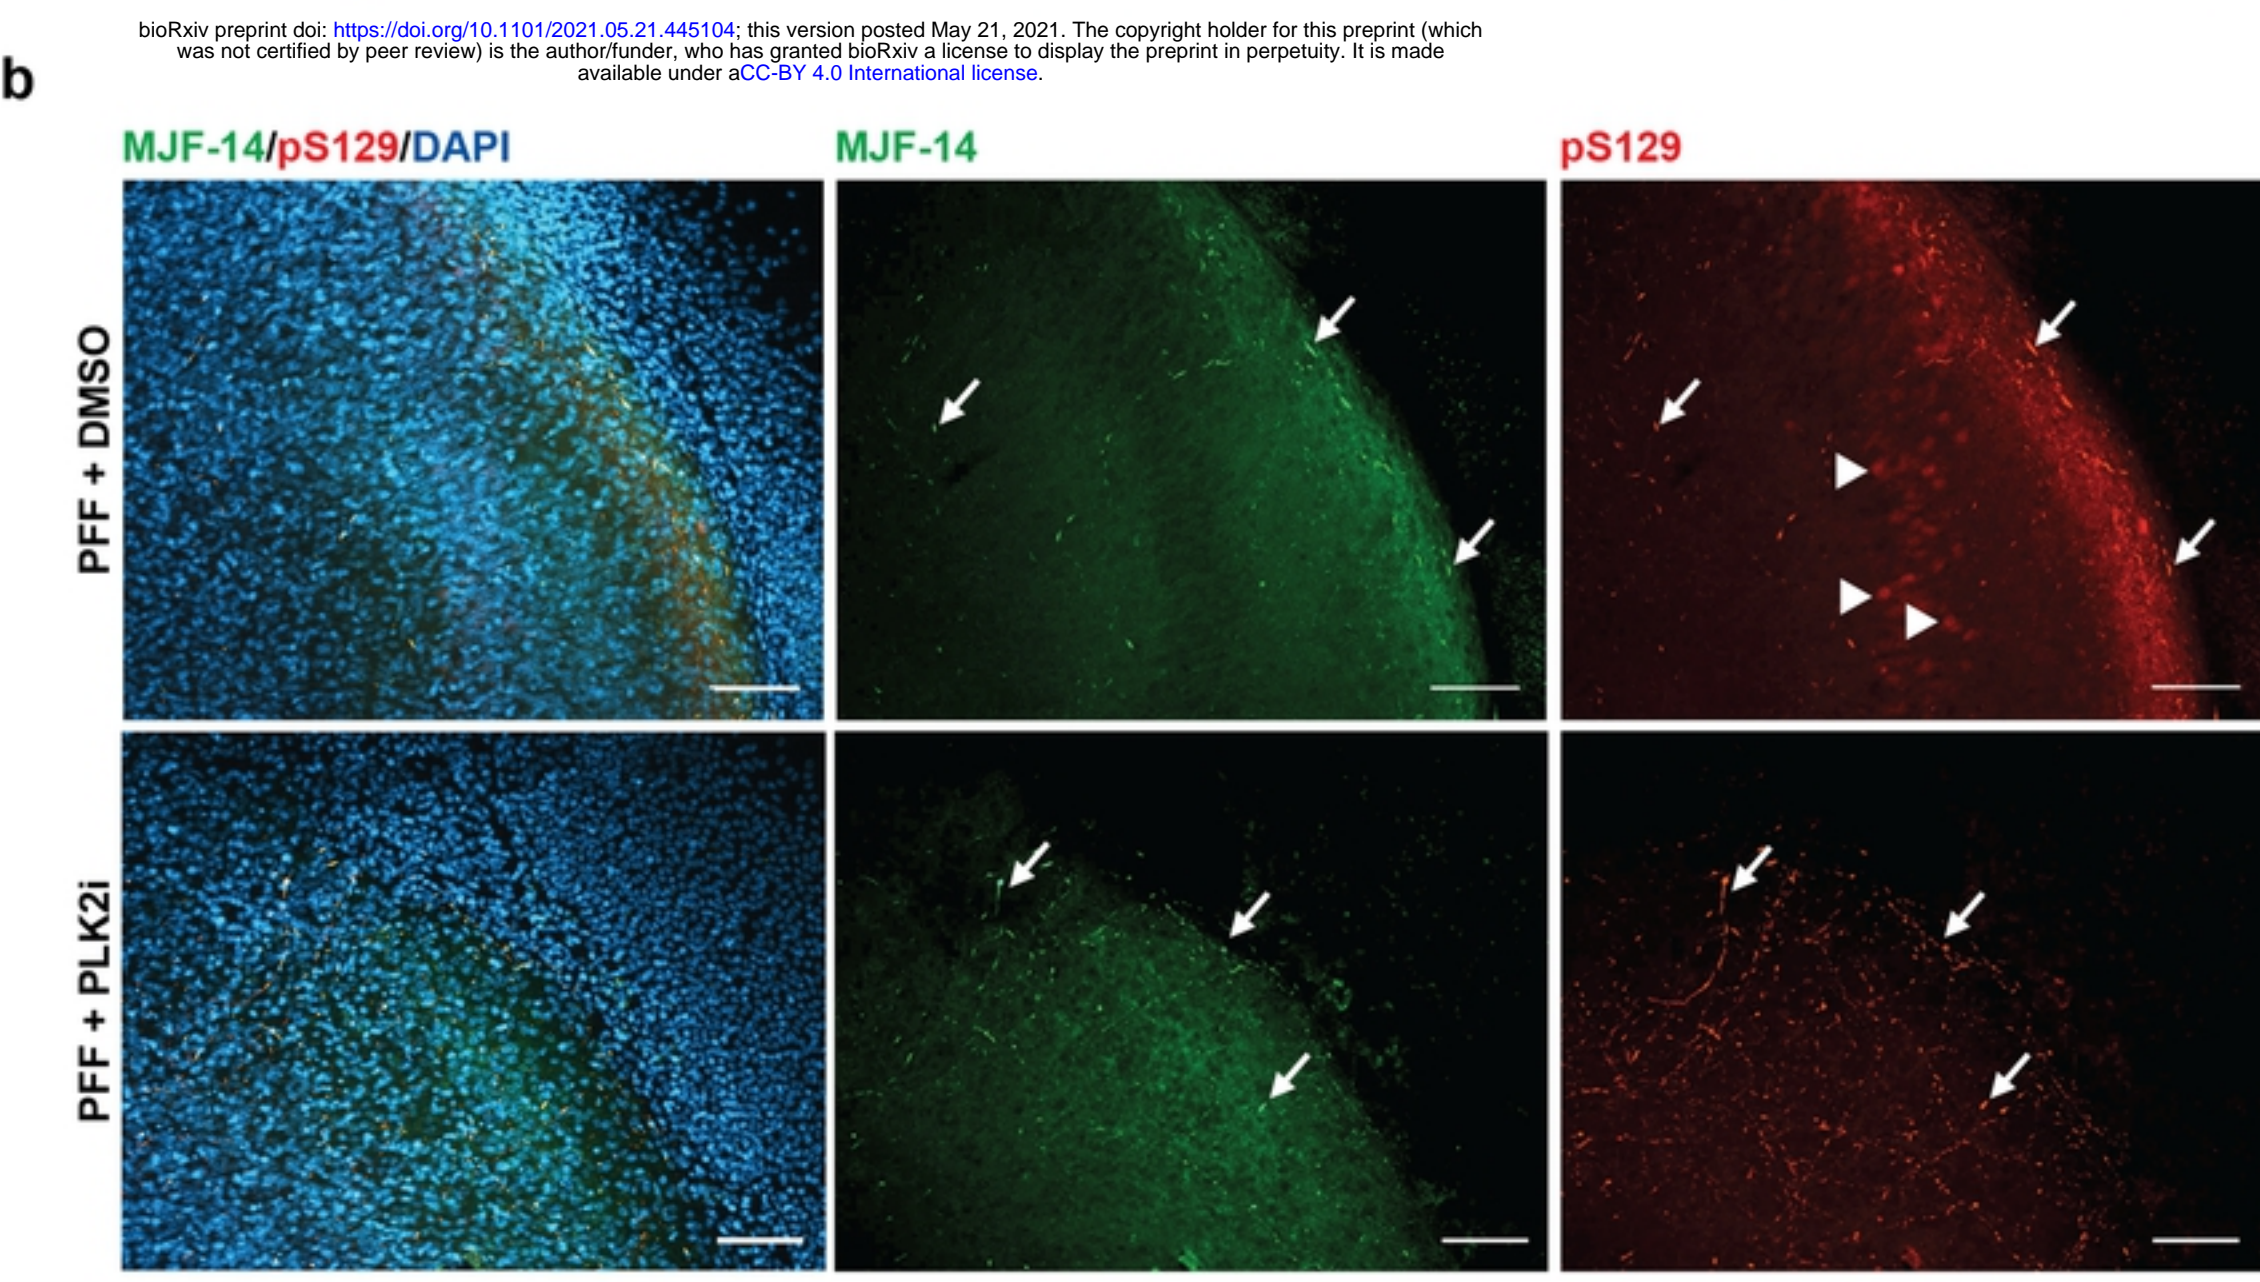

Figure

a

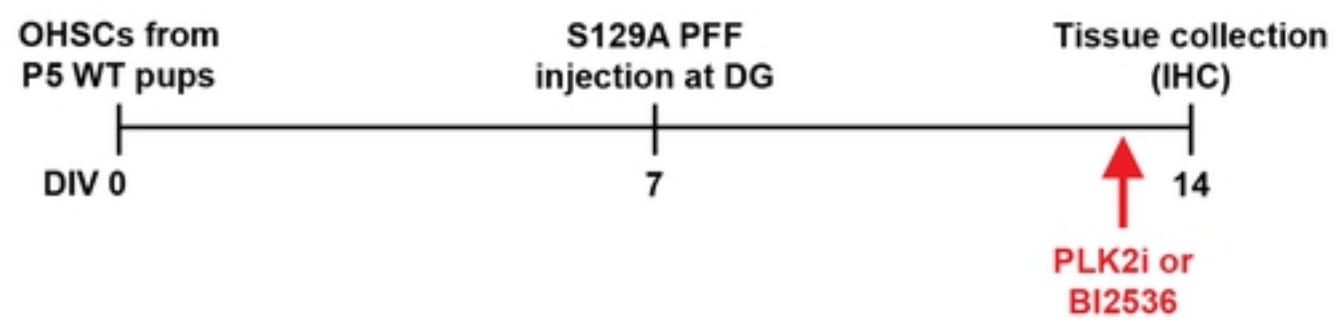

bioRxiv preprint doi: <https://doi.org/10.1101/2021.05.21.445104>; this version posted May 21, 2021. The copyright holder for this preprint (which was not certified by peer review) is the author/funder, who has granted bioRxiv a license to display the preprint in perpetuity. It is made available under aCC-BY 4.0 International license.

c

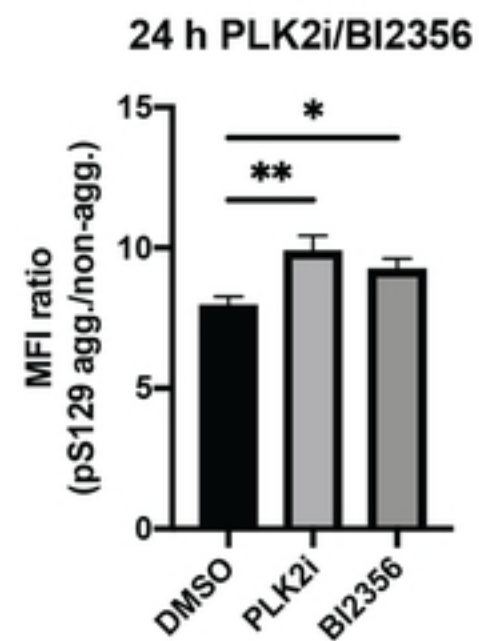

b

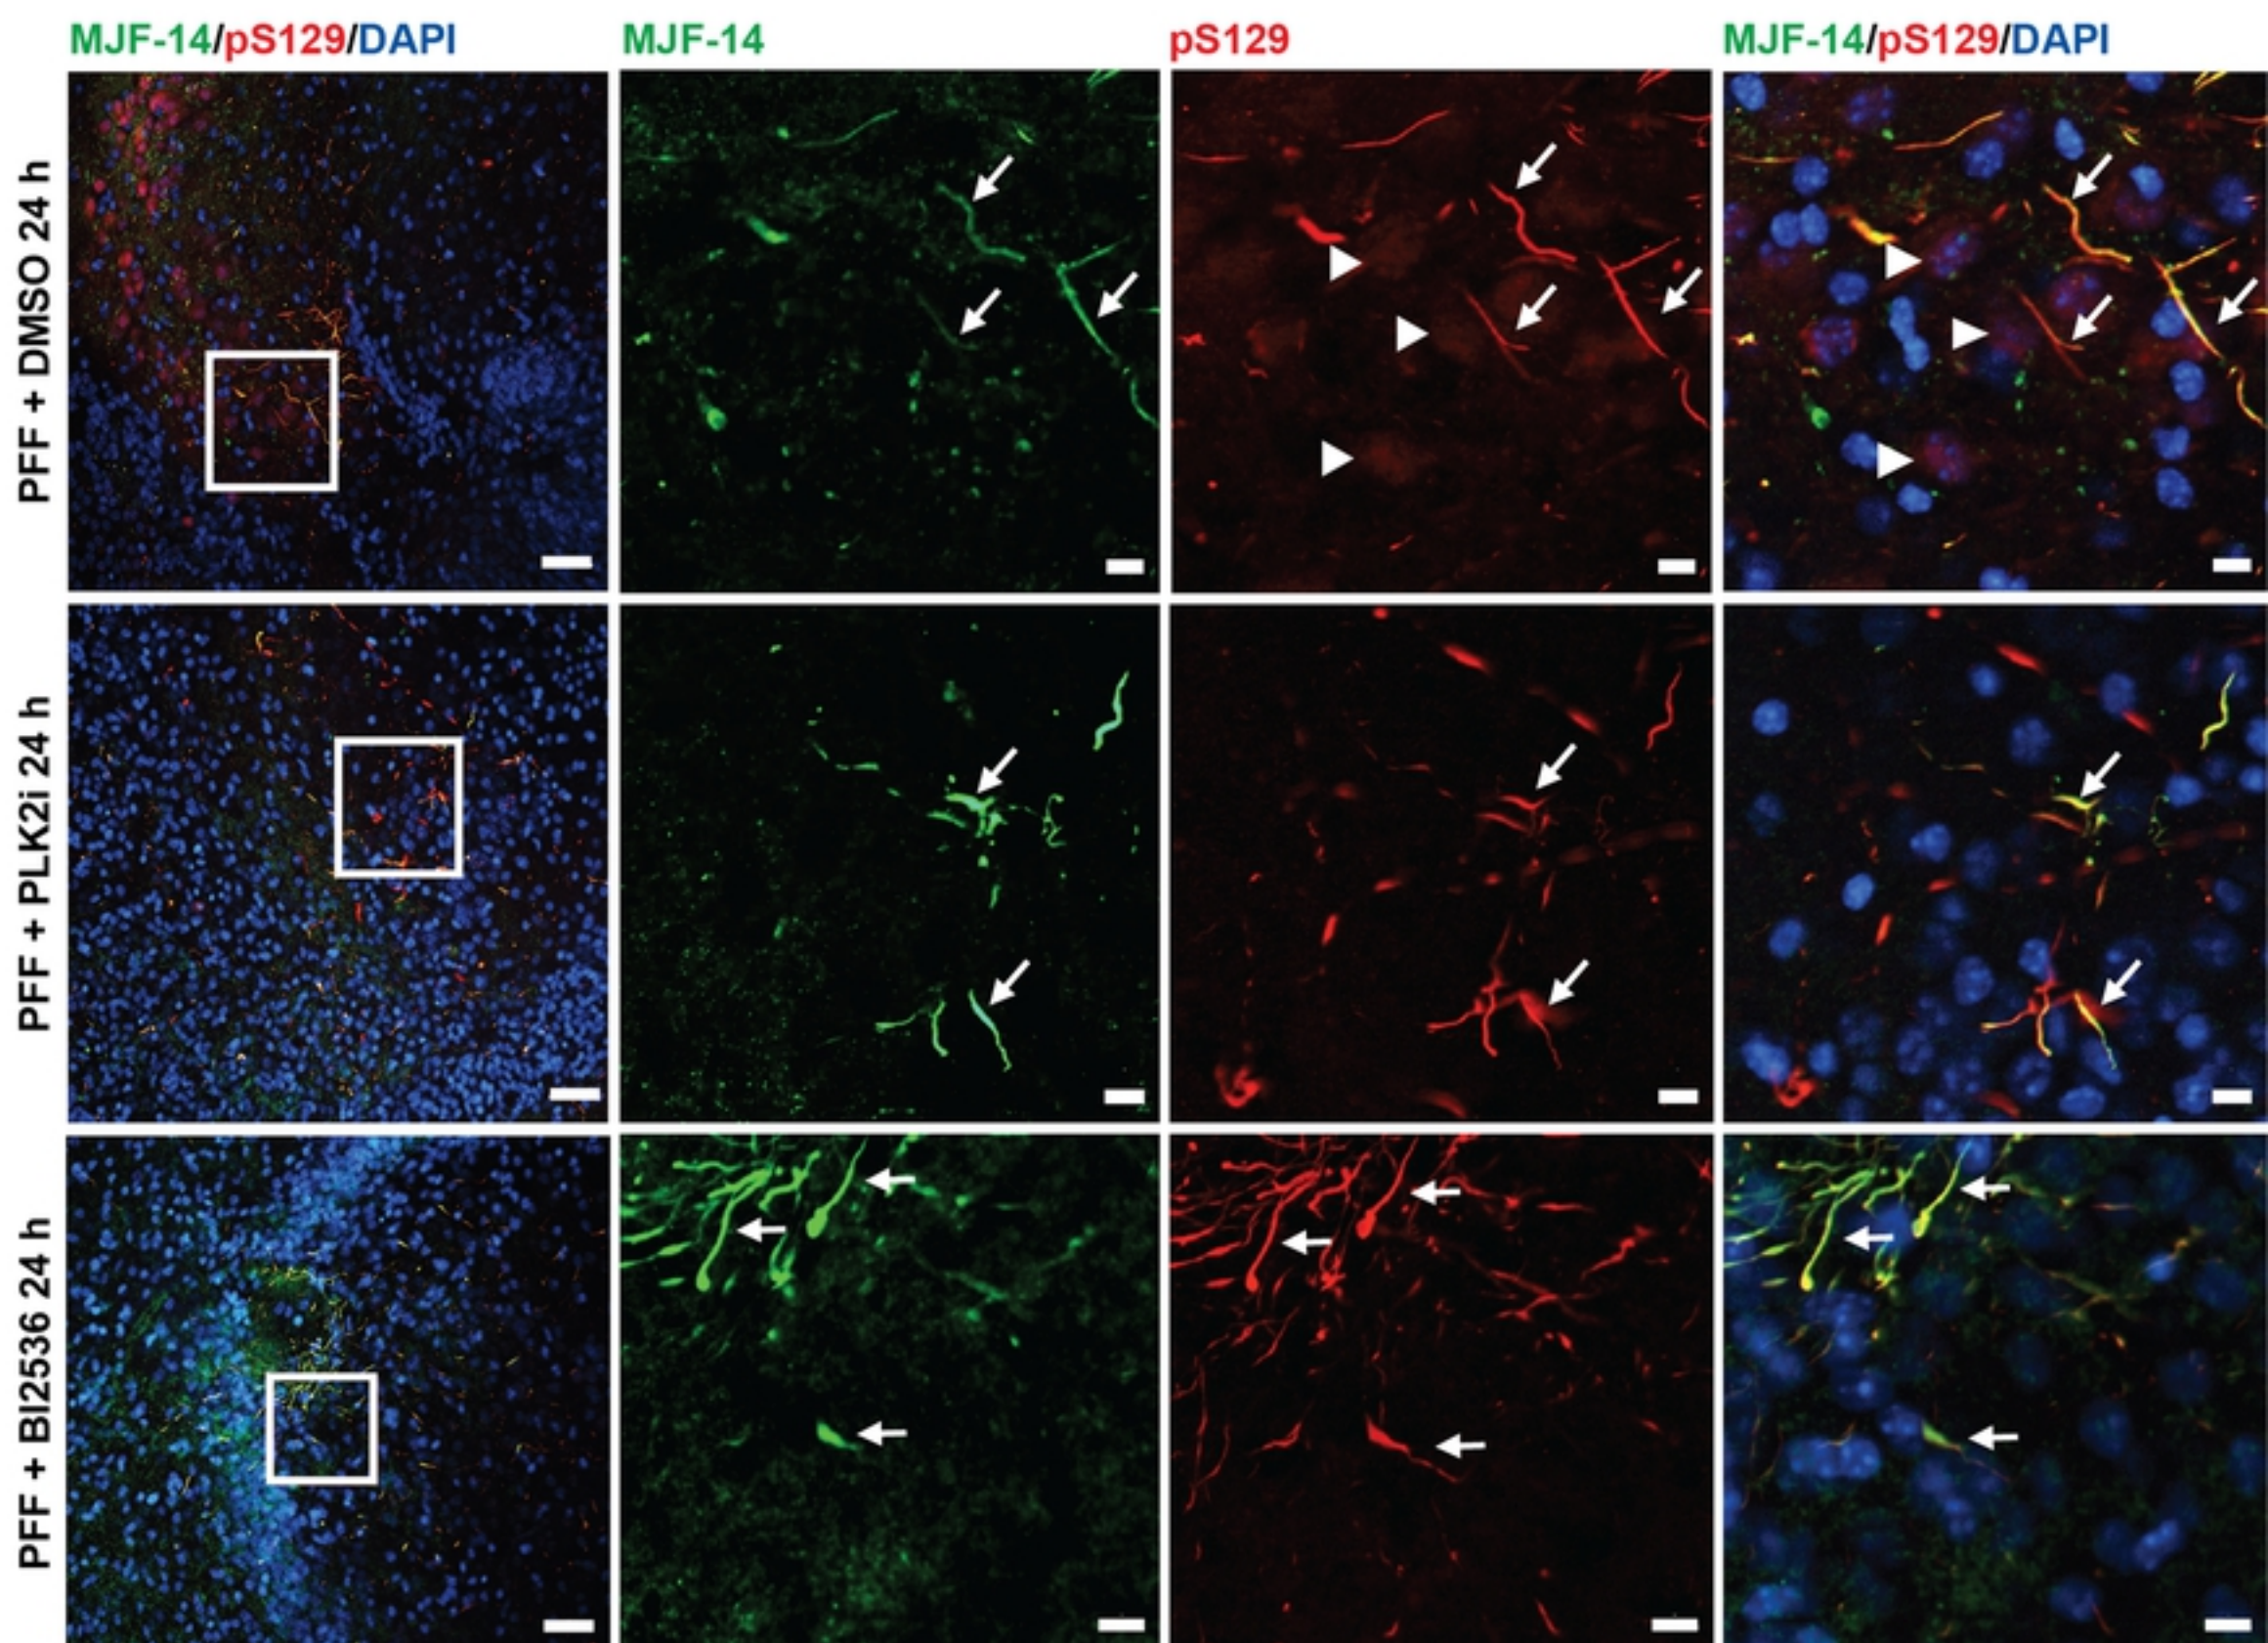

Figure

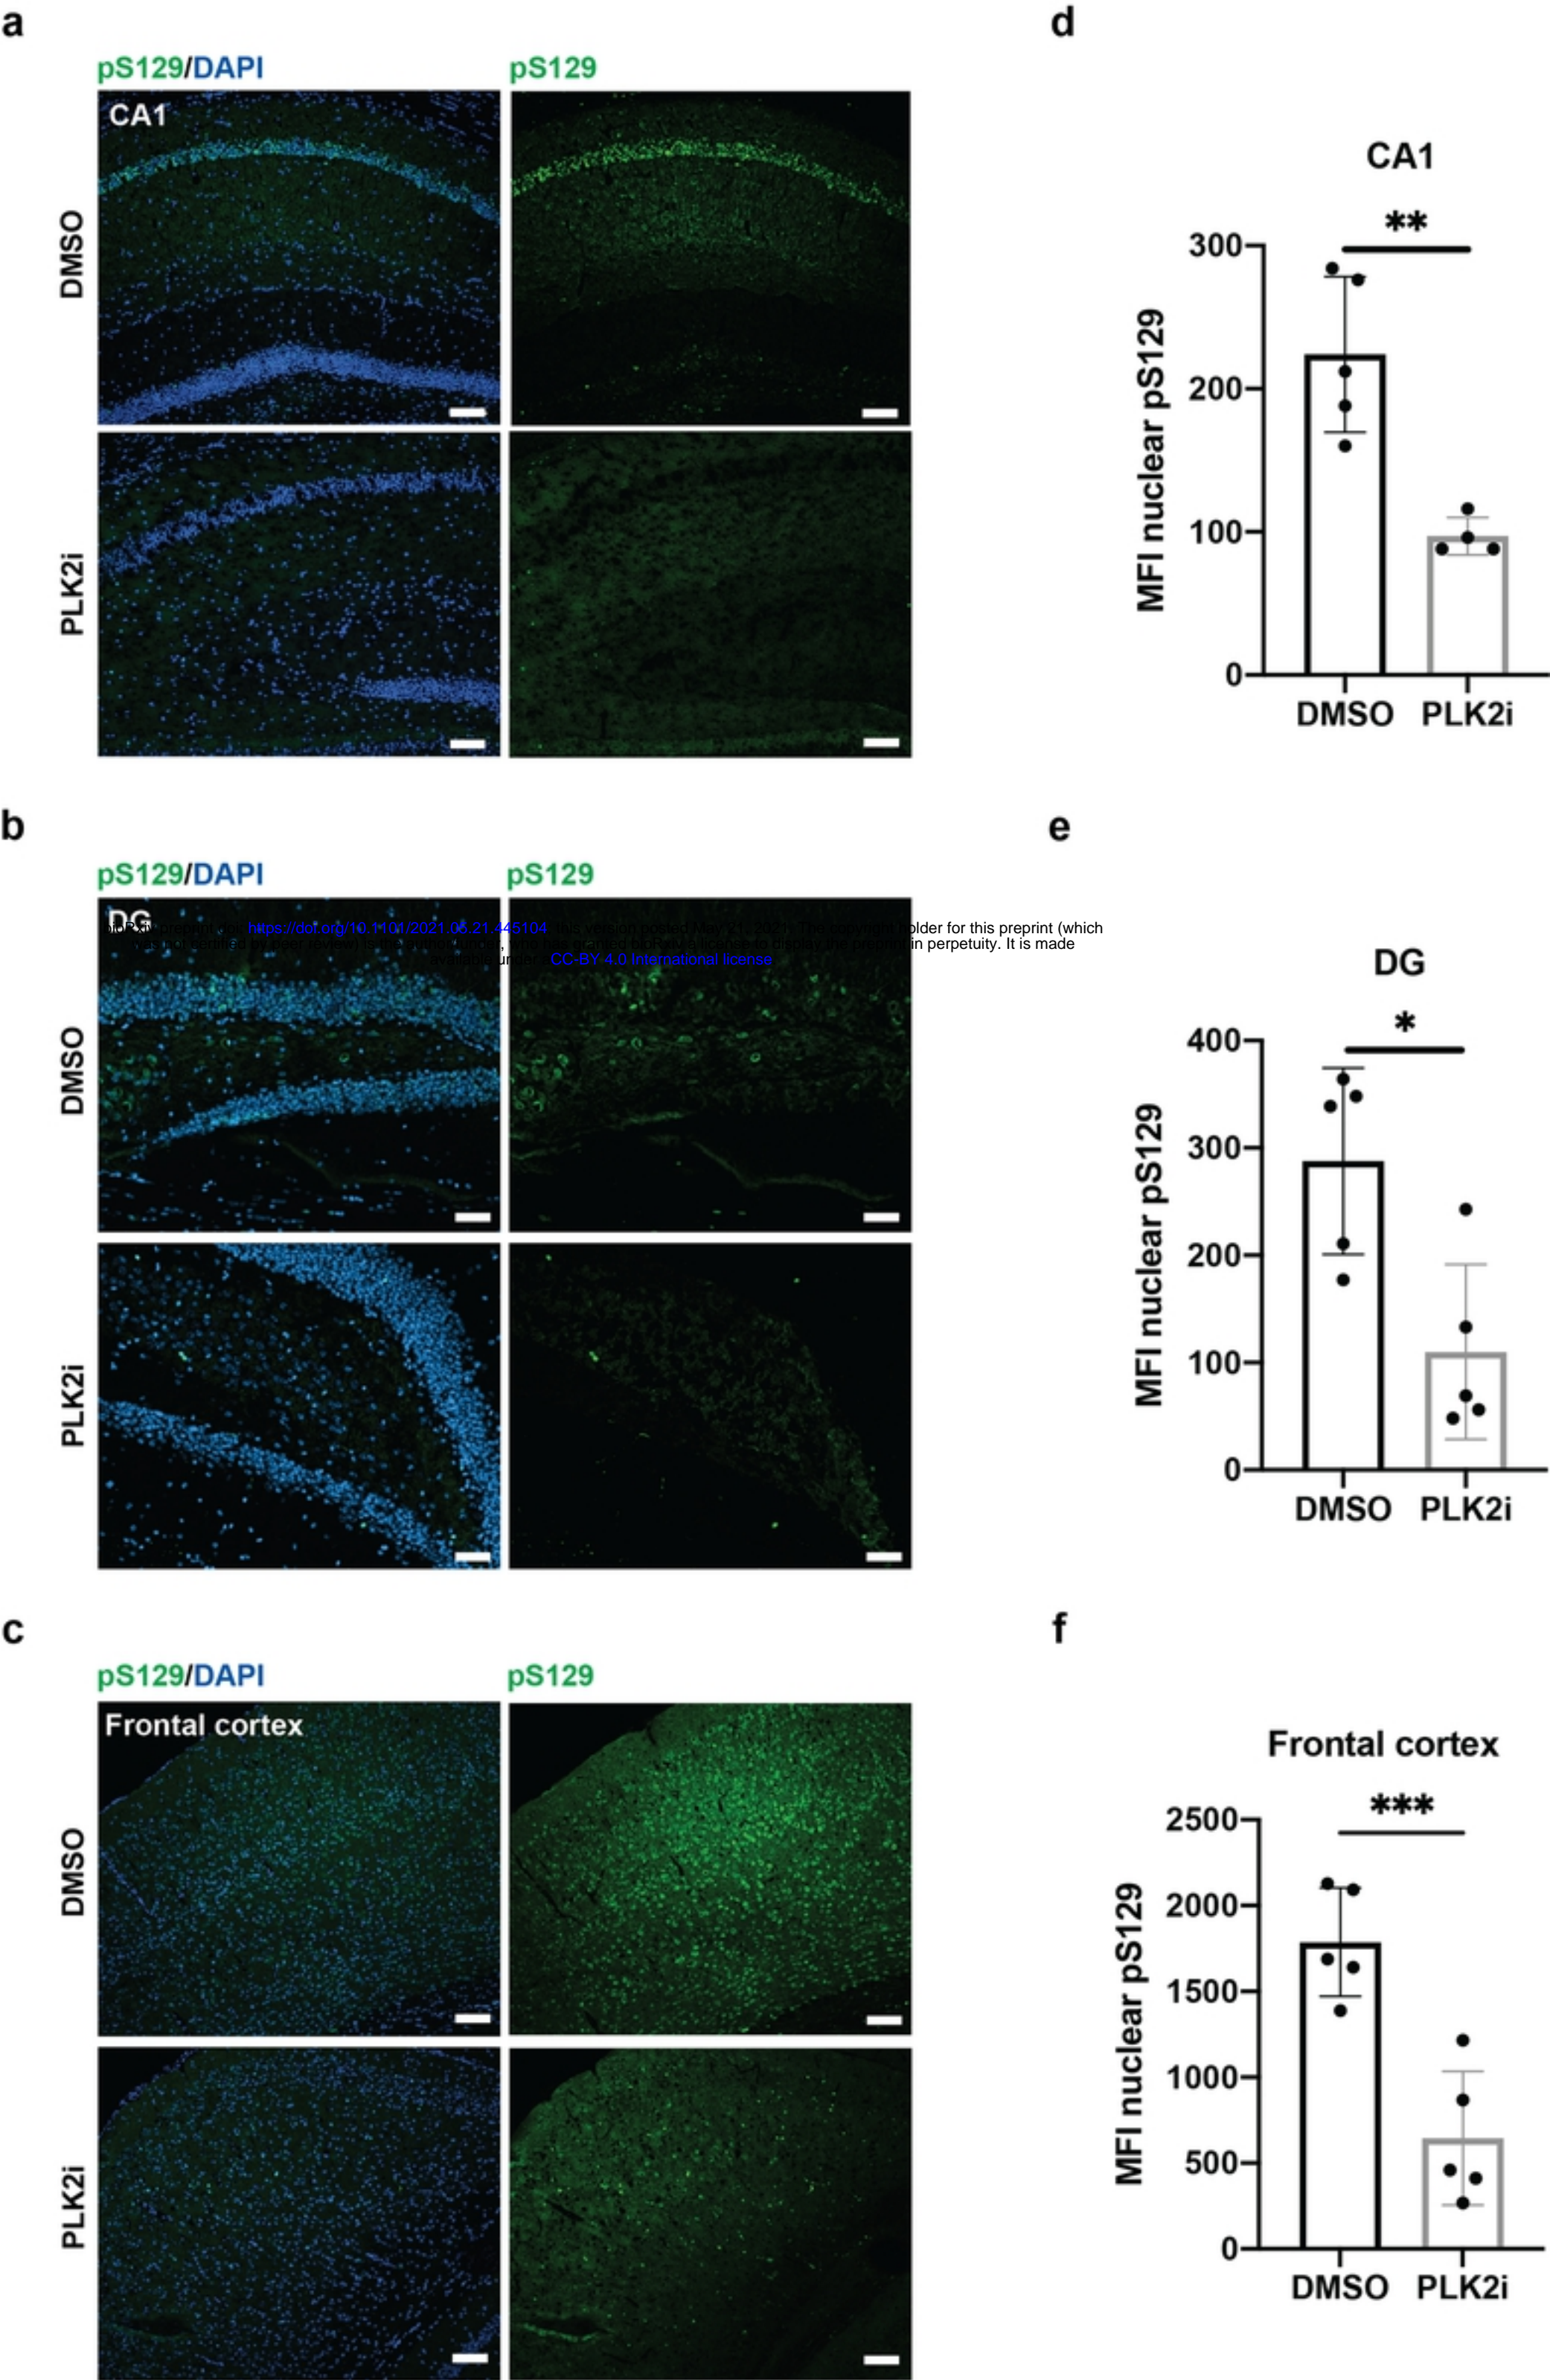

Figure



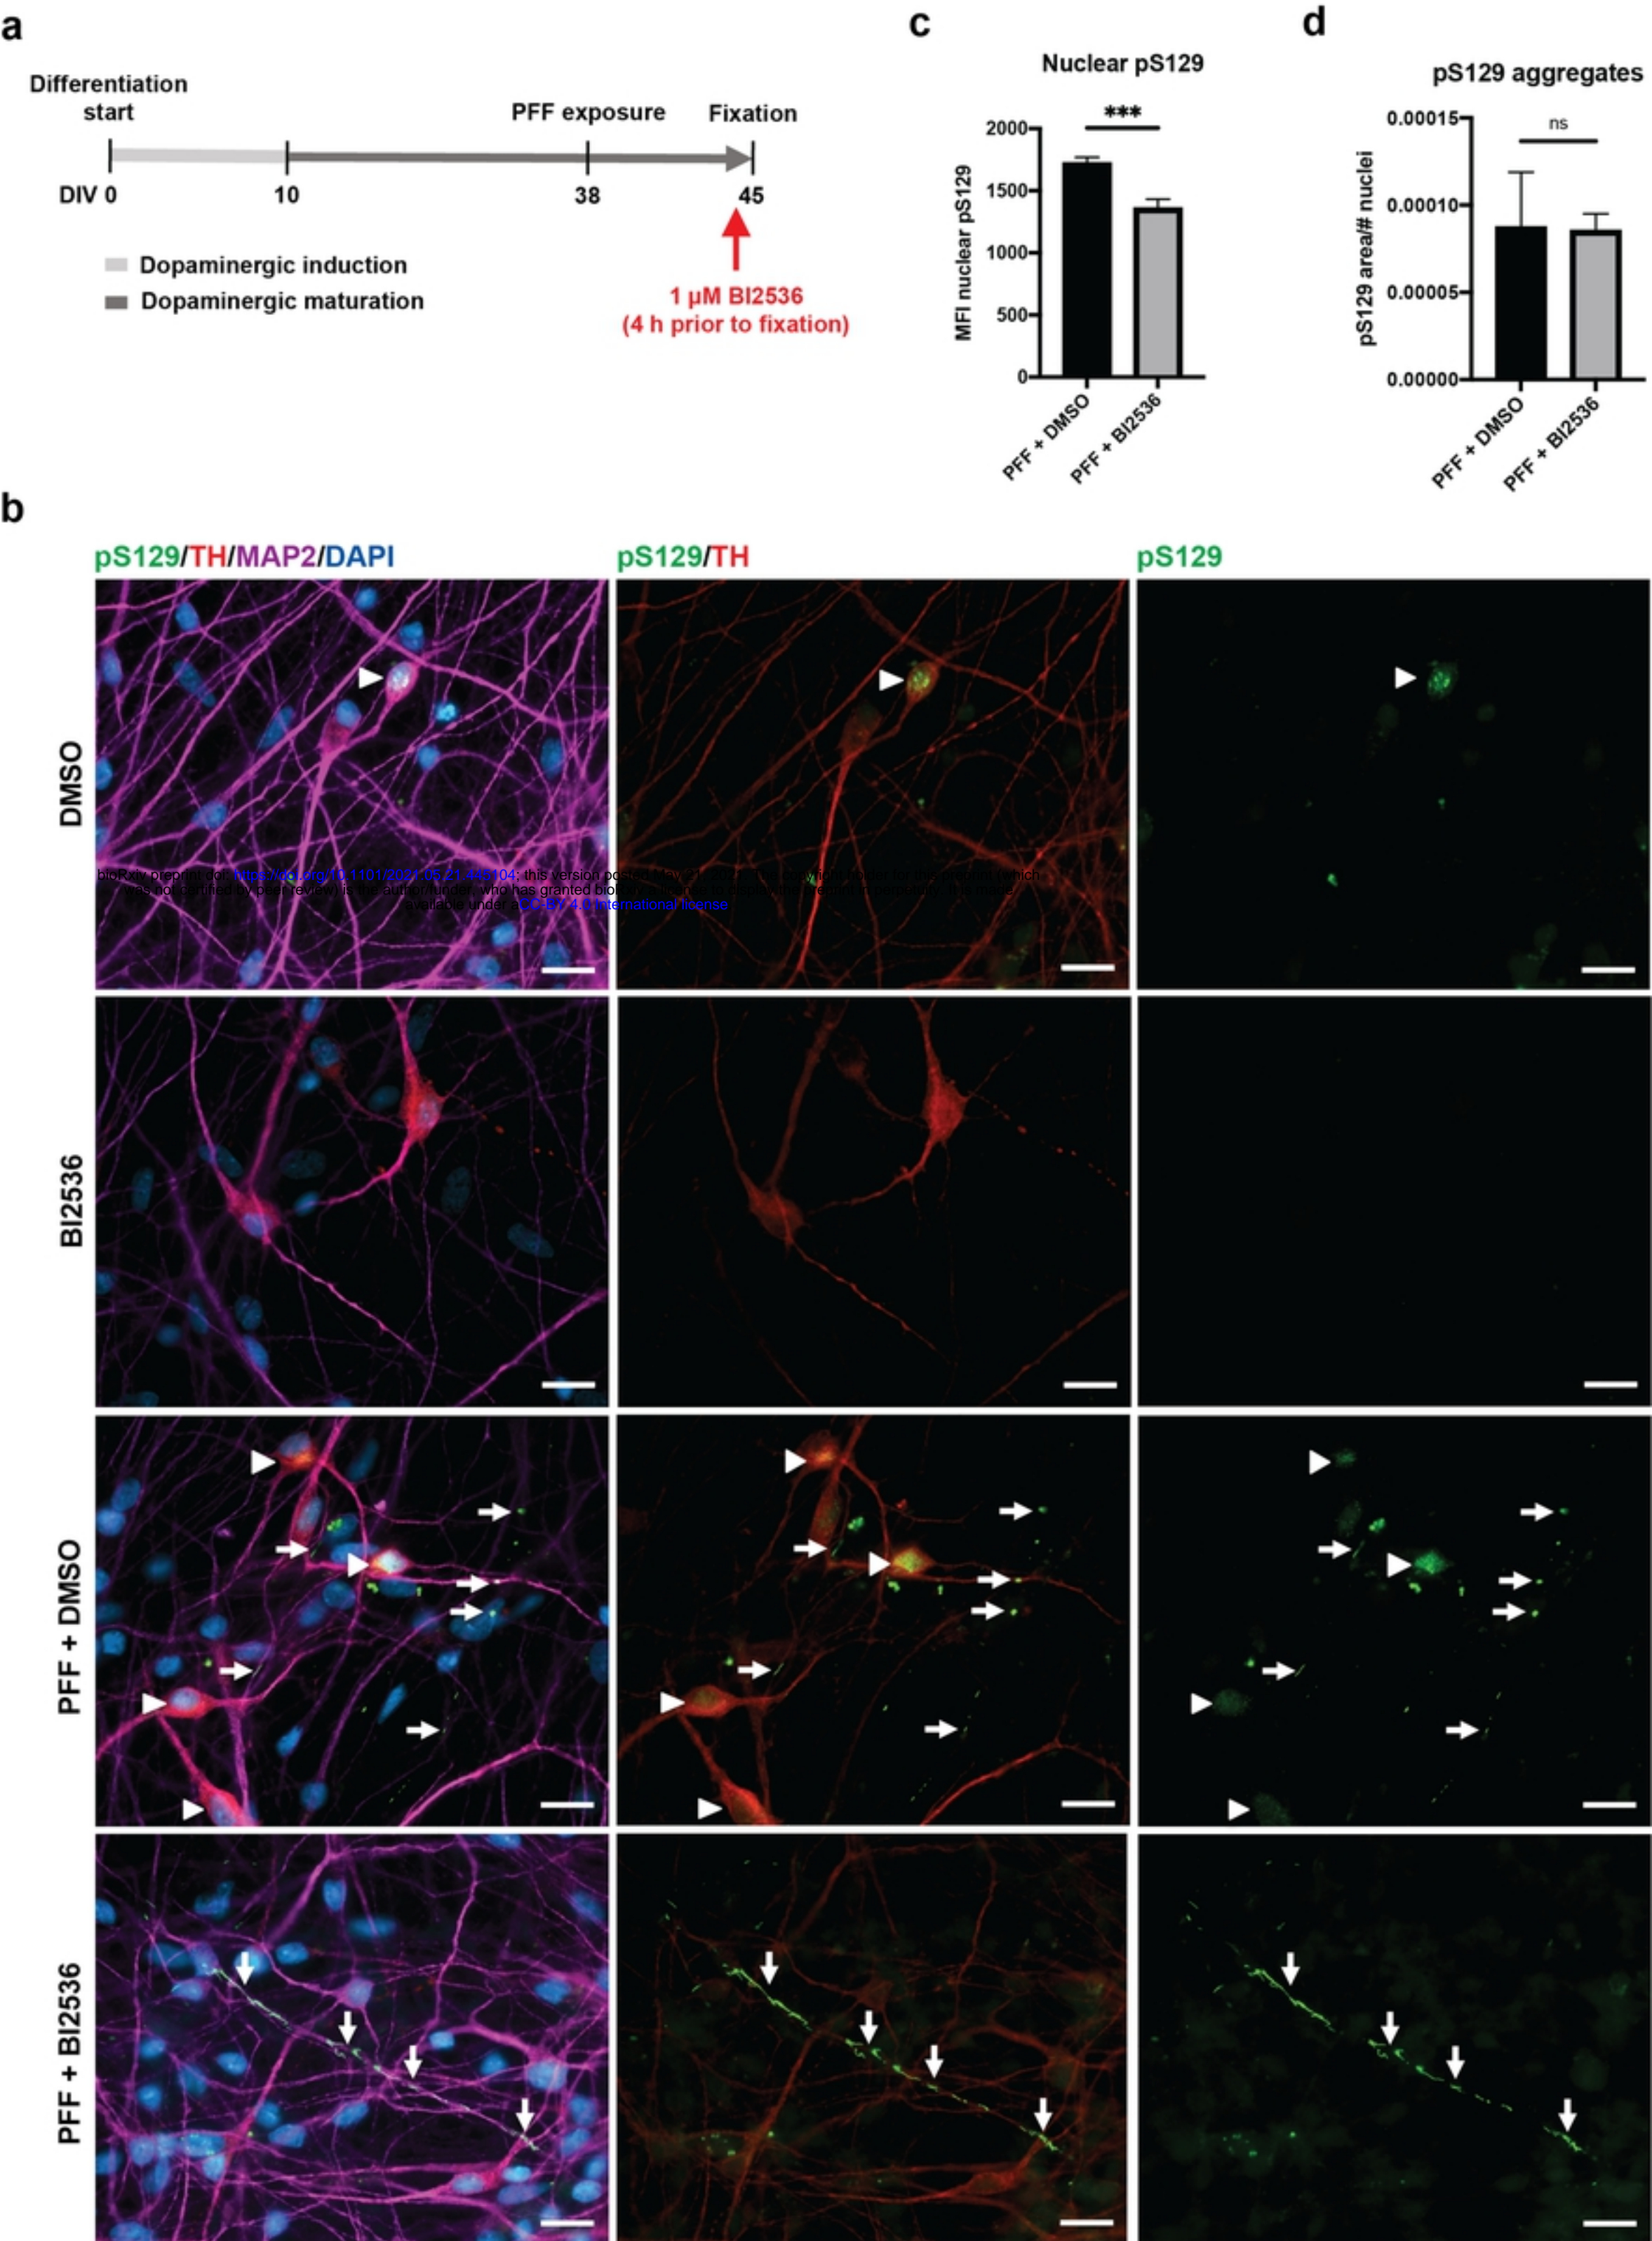

Source: https://biorxiv.org/content/10.1101/2021.05.21.445104v1.full.pdf
